# Supplementary figures and images for: Molecular role of GATA binding protein 4 (GATA-4) in hyperglycemia-induced reduction of cardiac contractility
Source: Springer Nature journal article supplement (doi:10.1186/1475-2840-10-57), 2011-06-24

(A)

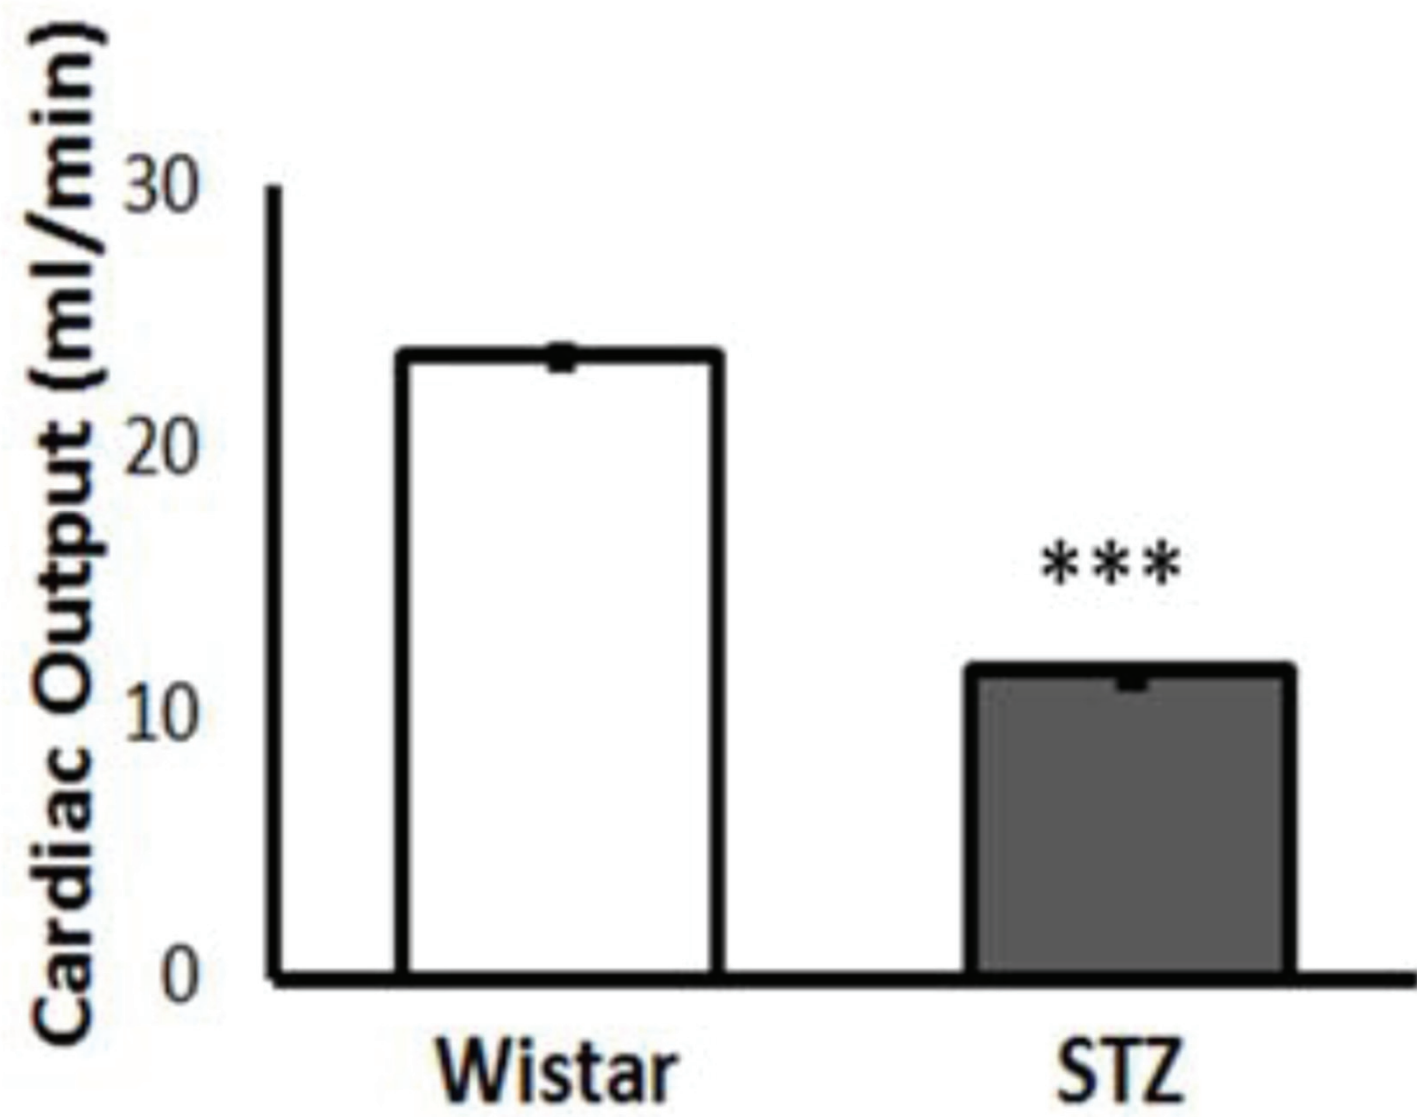

(B)

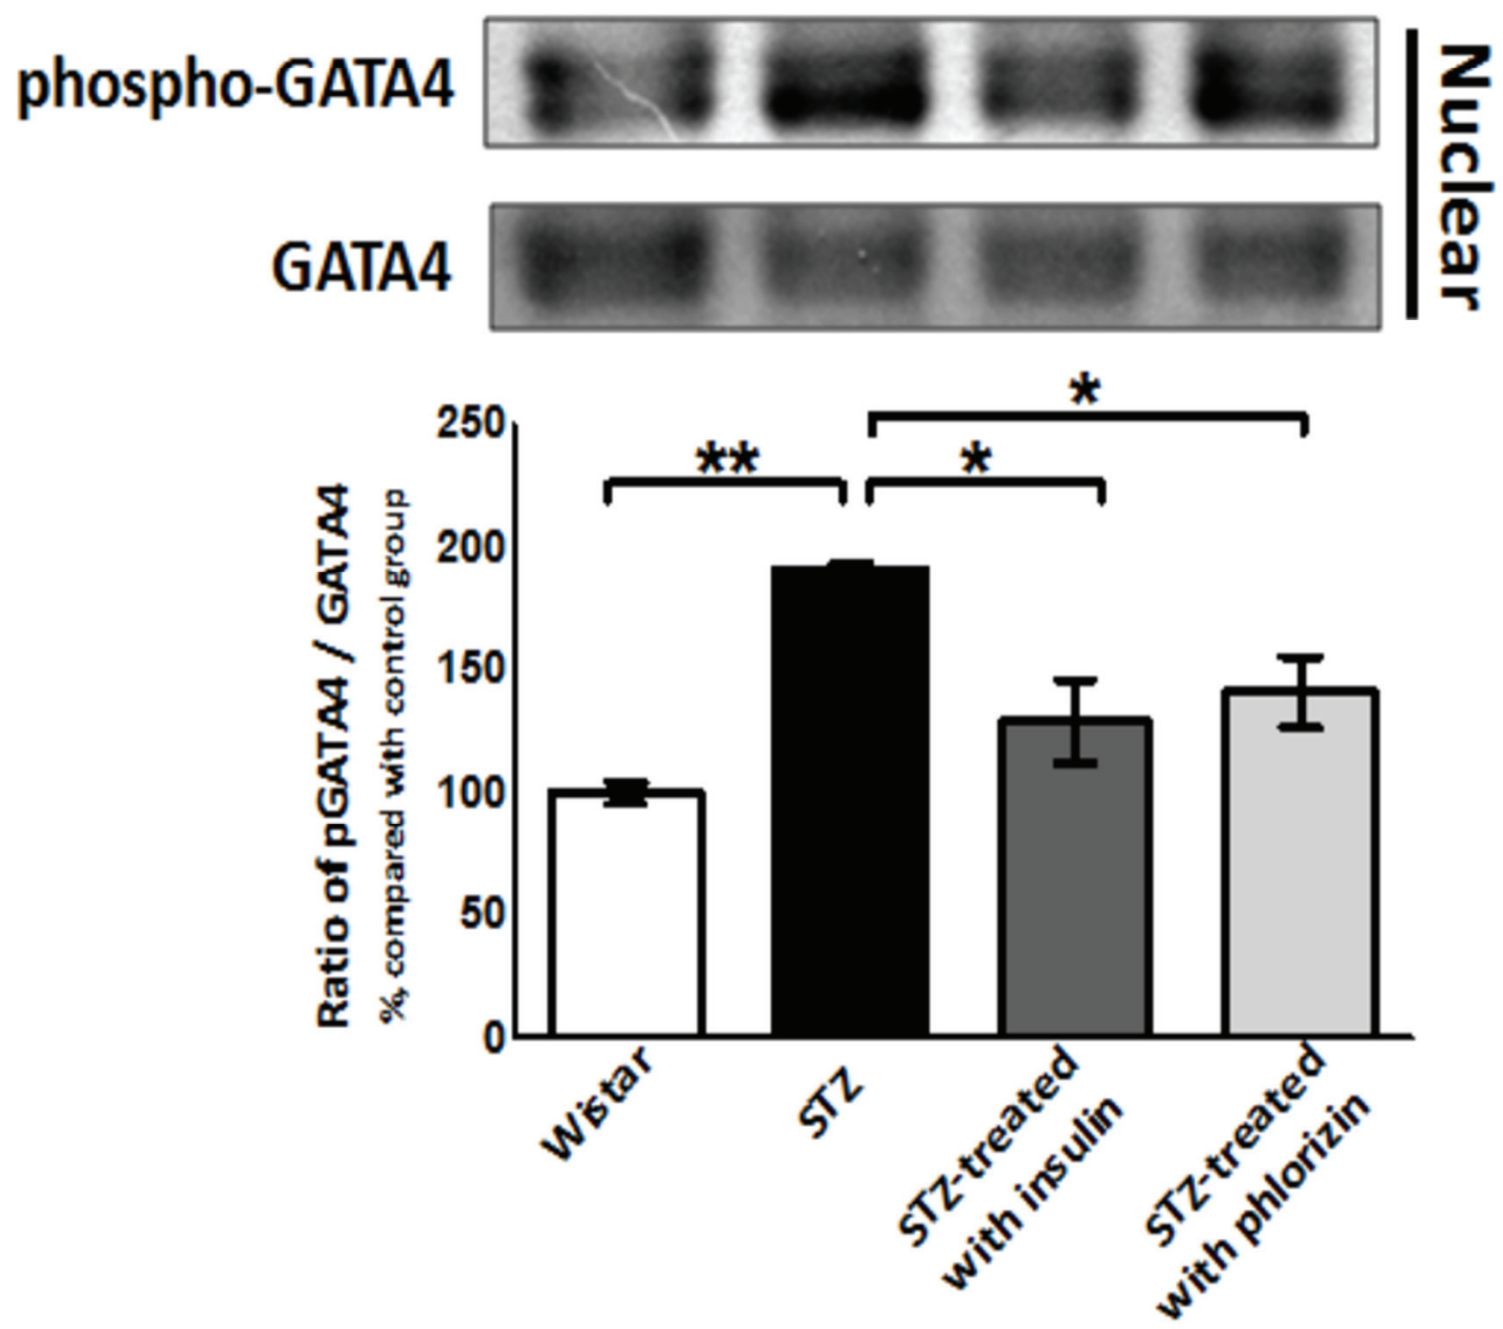

(C)

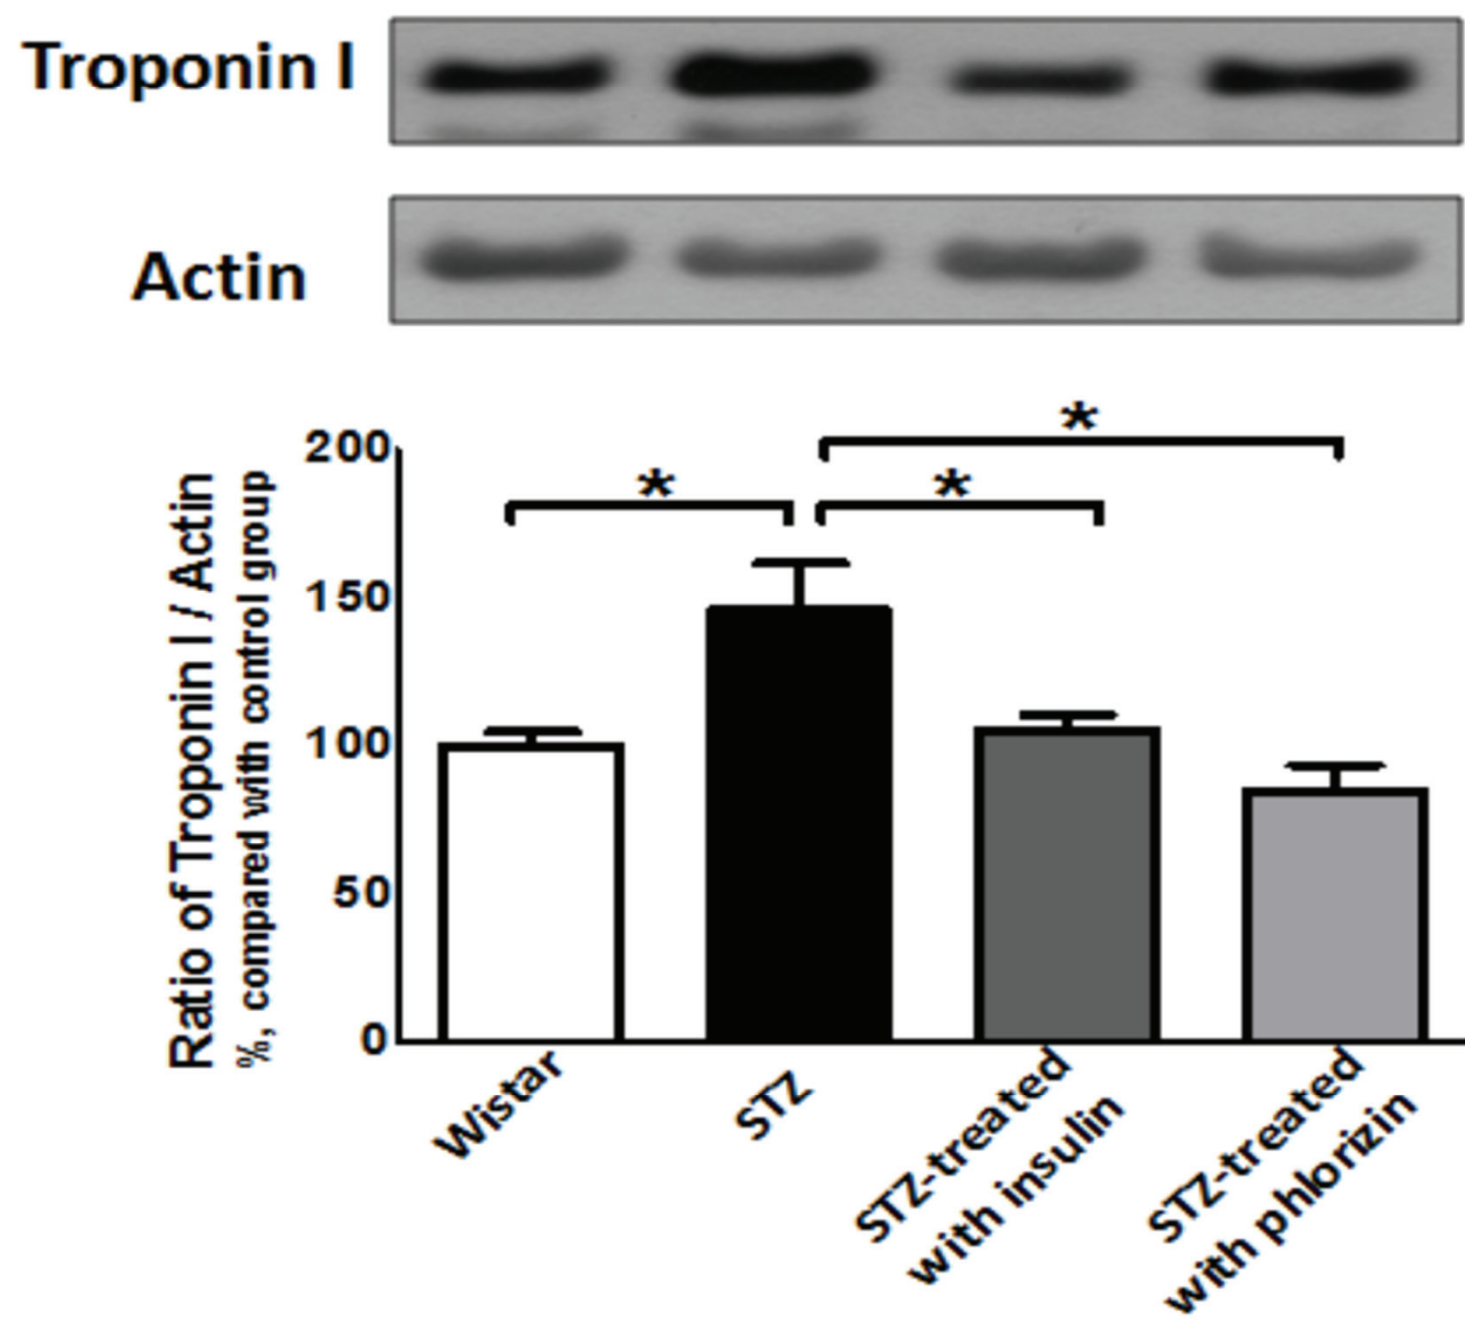

Supplement: 12933_2011_364_MOESM1_ESM.pdf [file 12933_2011_364_MOESM1_ESM.pdf]

**(A)****Rat cardiac myocyte****H9c2**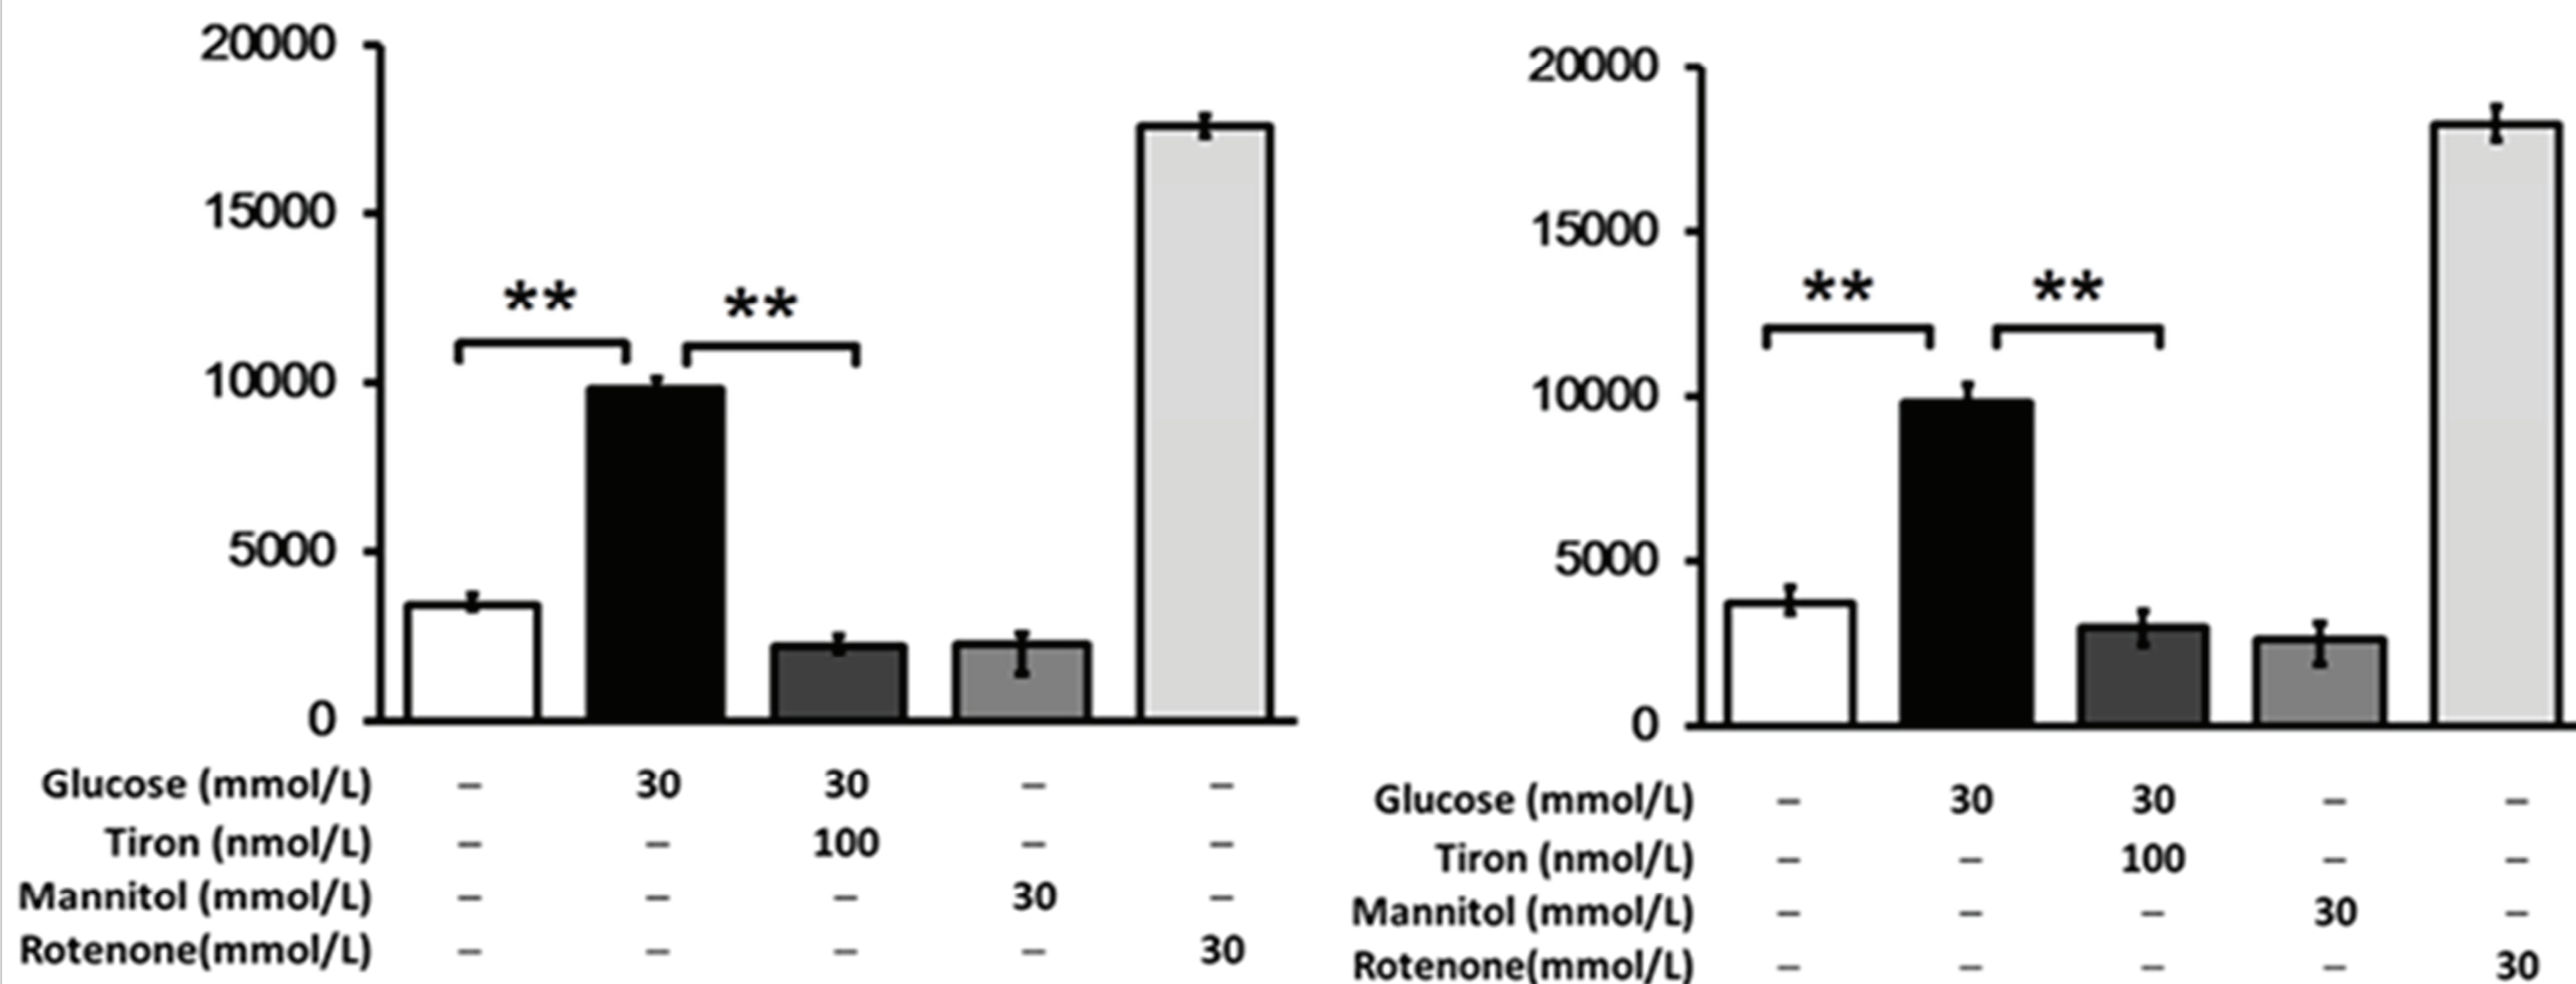**(B)****H9c2****Rat cardiac myocyte**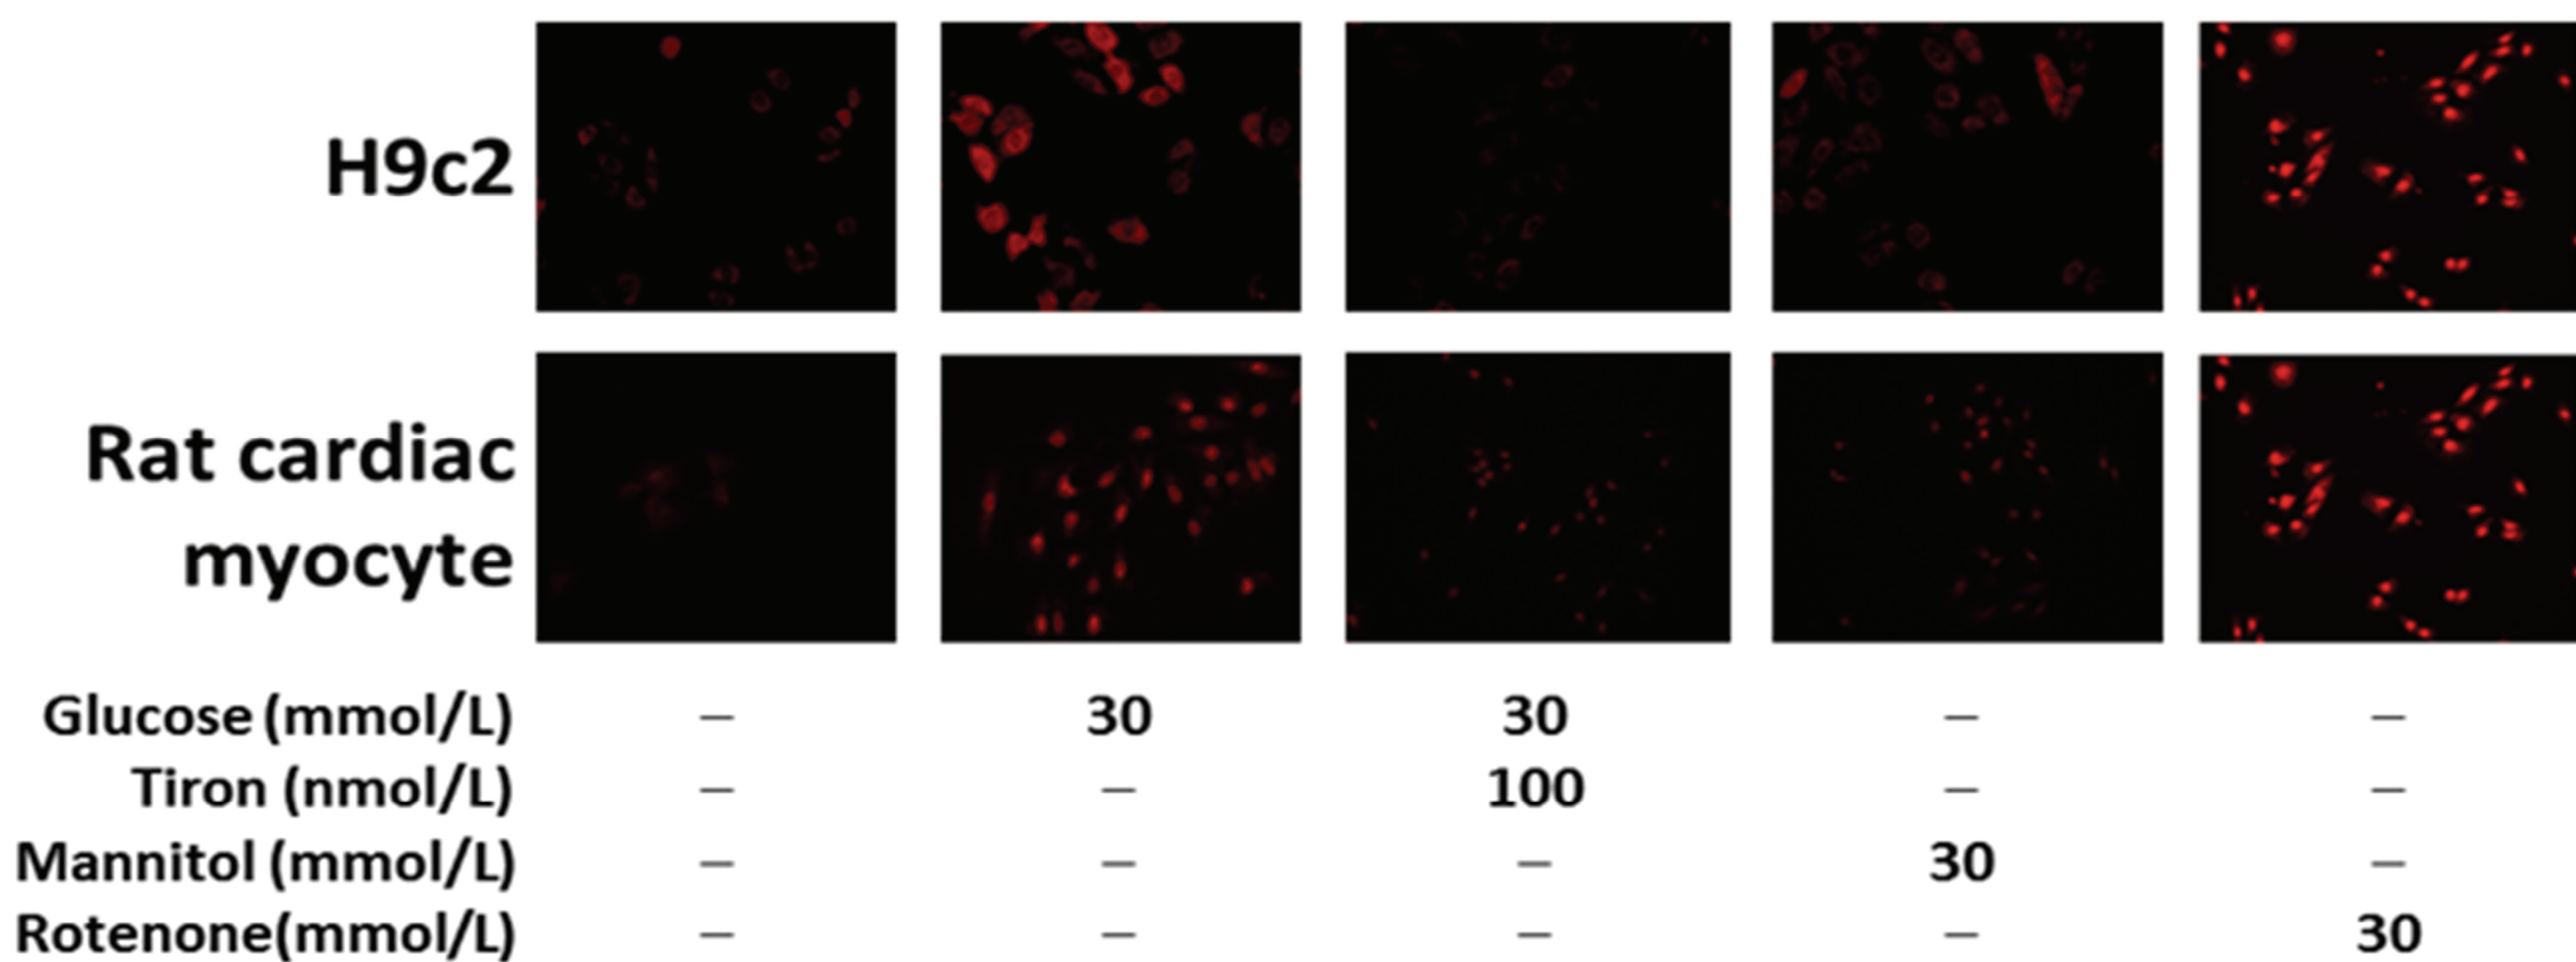

Supplement: 12933_2011_364_MOESM2_ESM.pdf [file 12933_2011_364_MOESM2_ESM.pdf]

**(A)**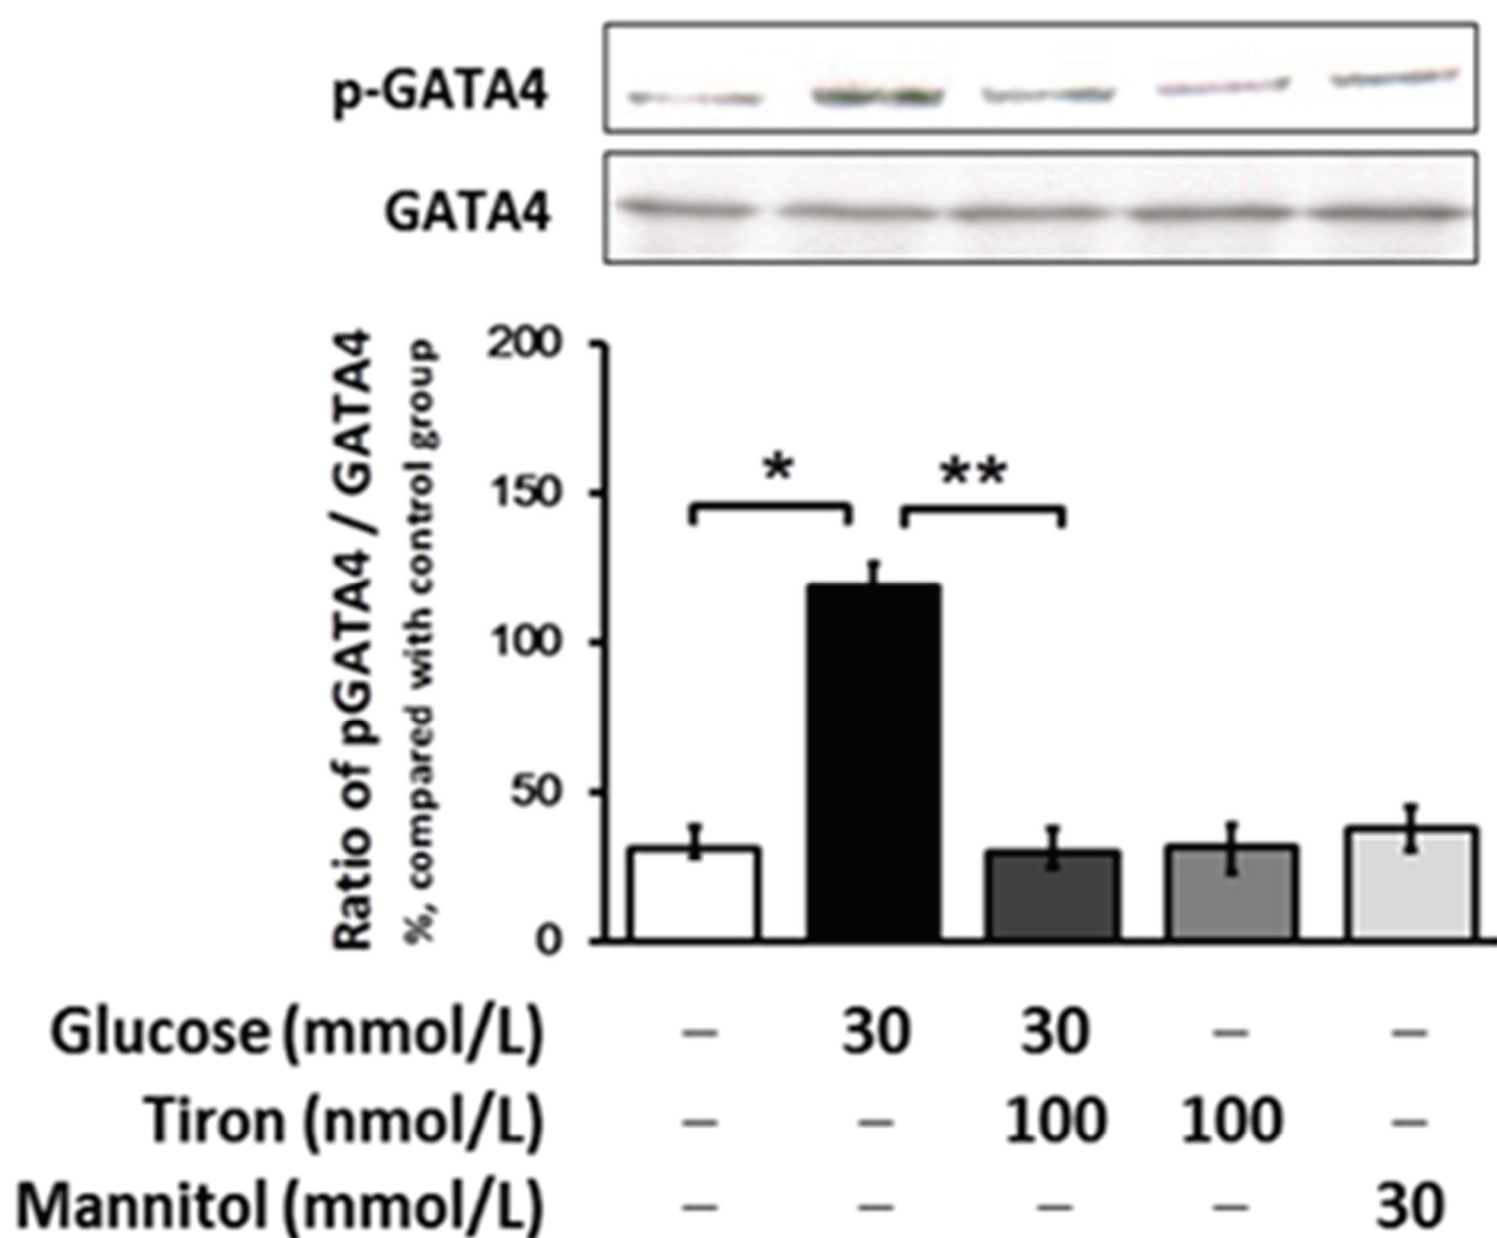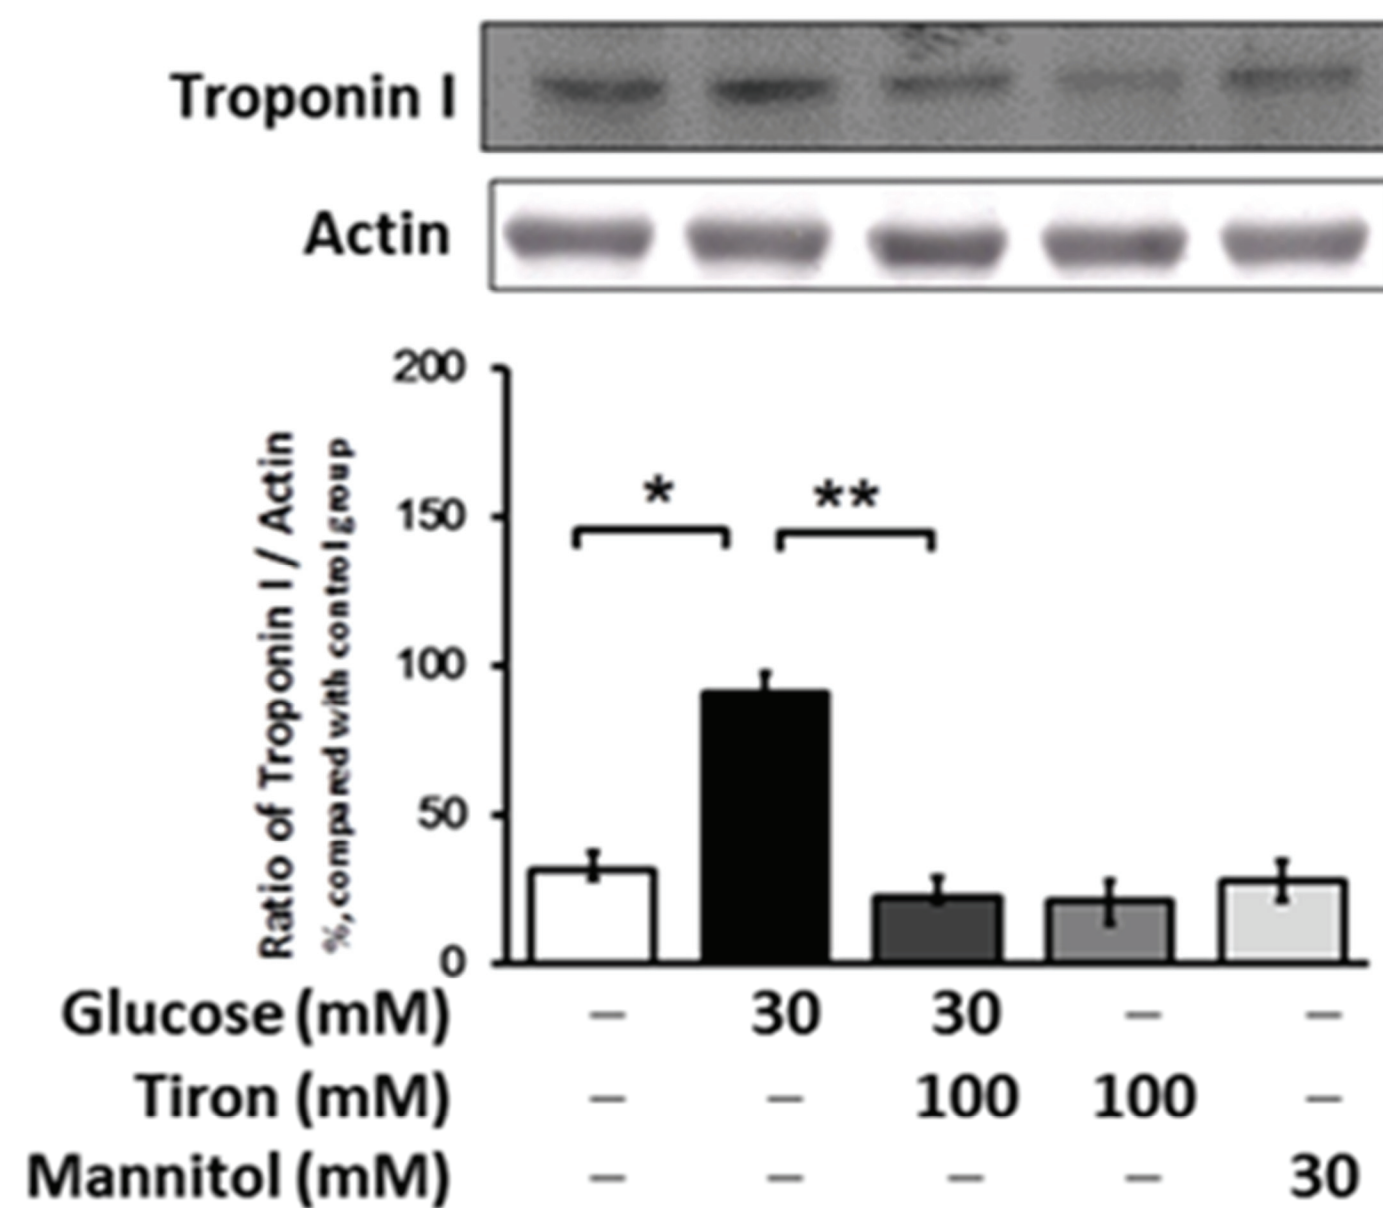**(B)**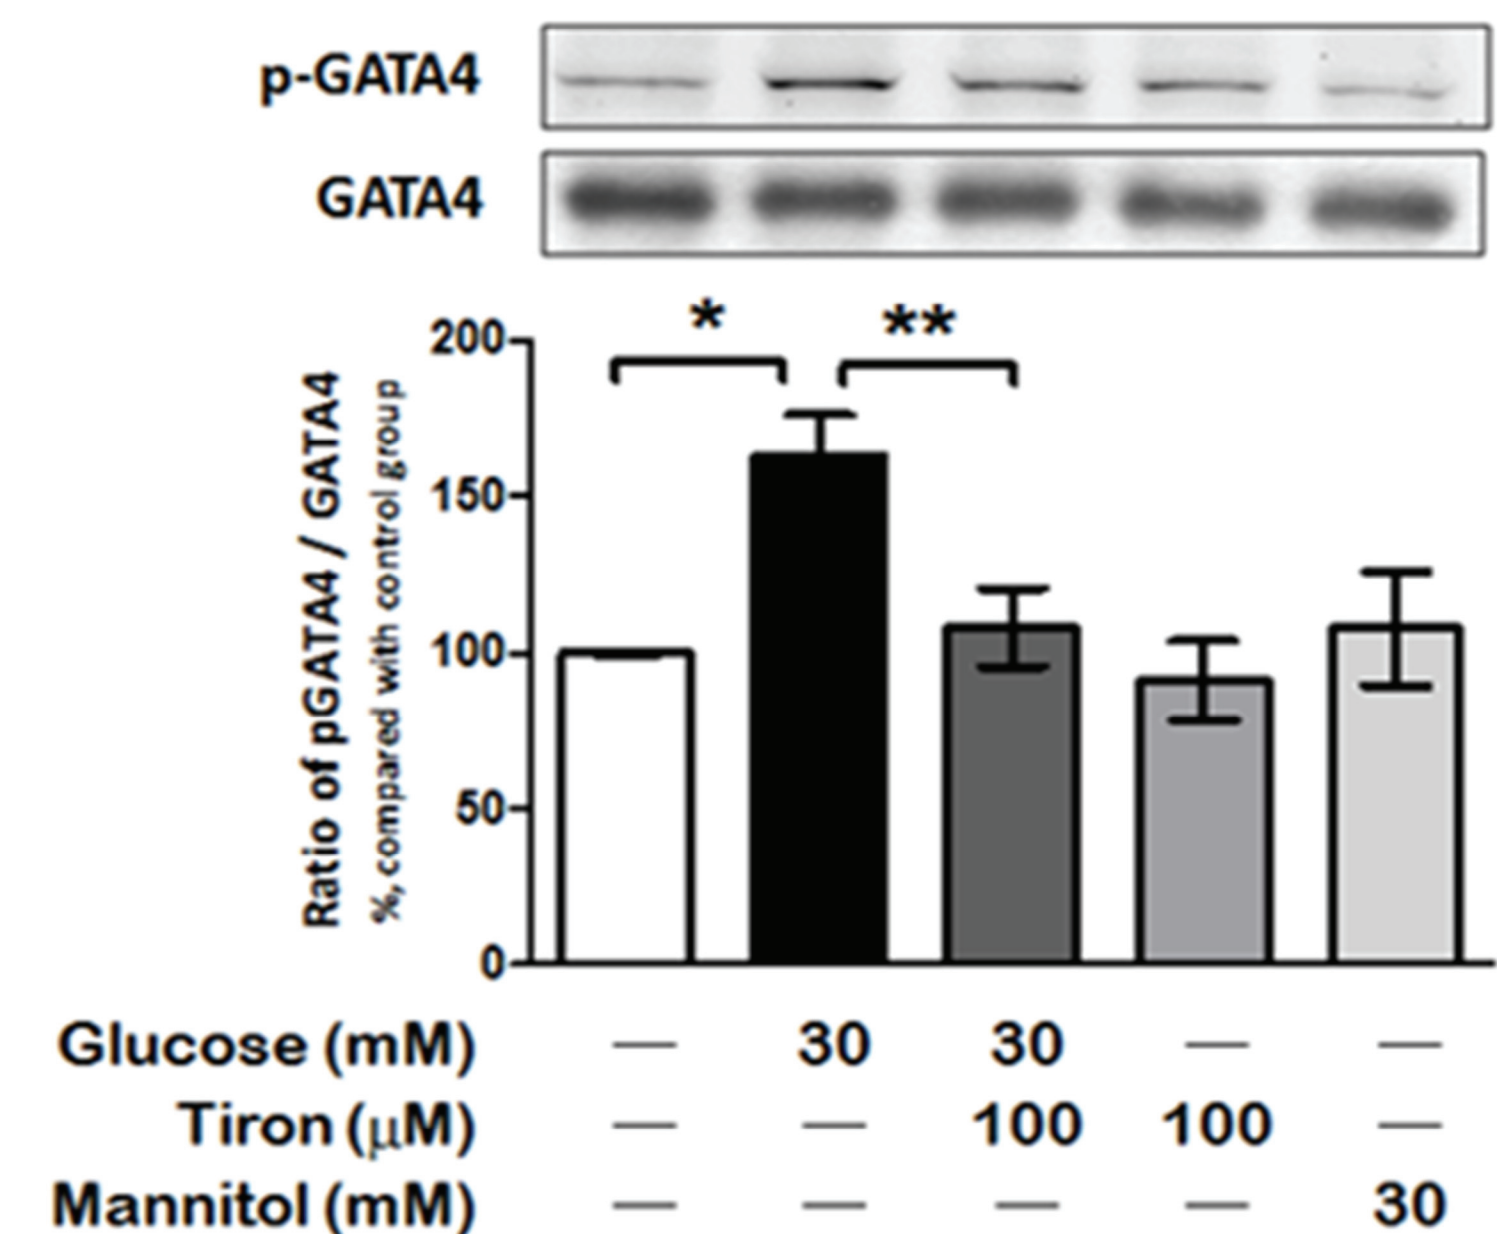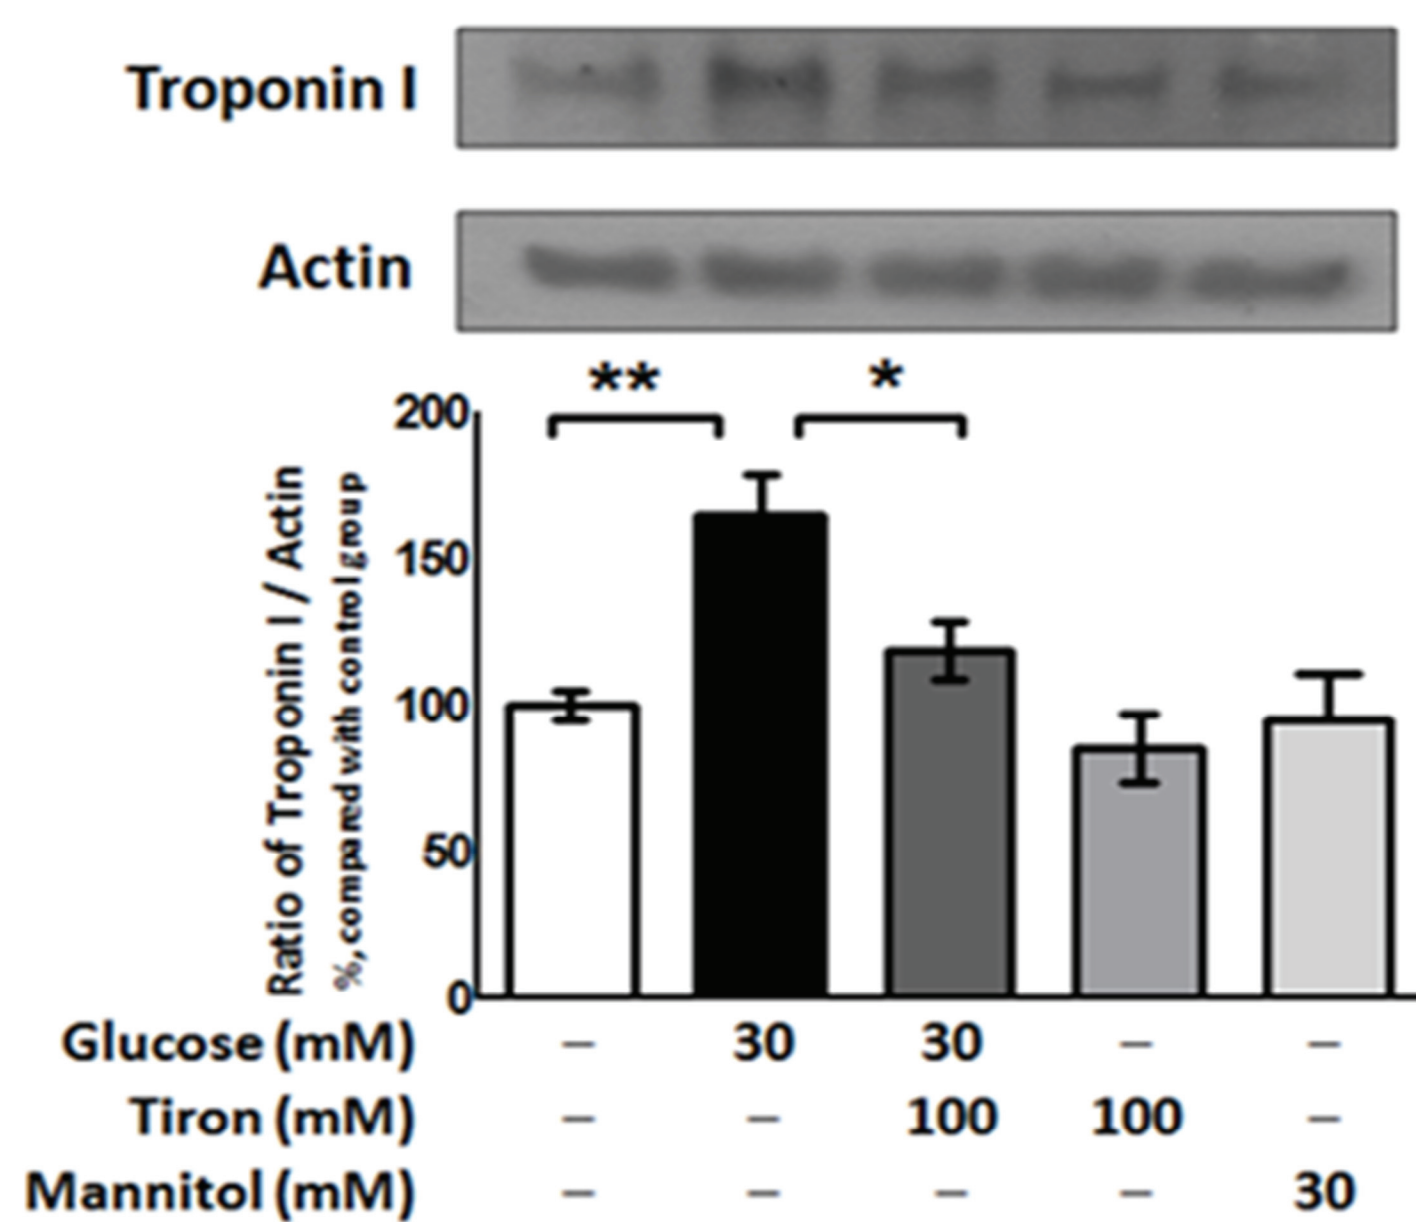

Supplement: 12933_2011_364_MOESM3_ESM.pdf [file 12933_2011_364_MOESM3_ESM.pdf]

**(A)**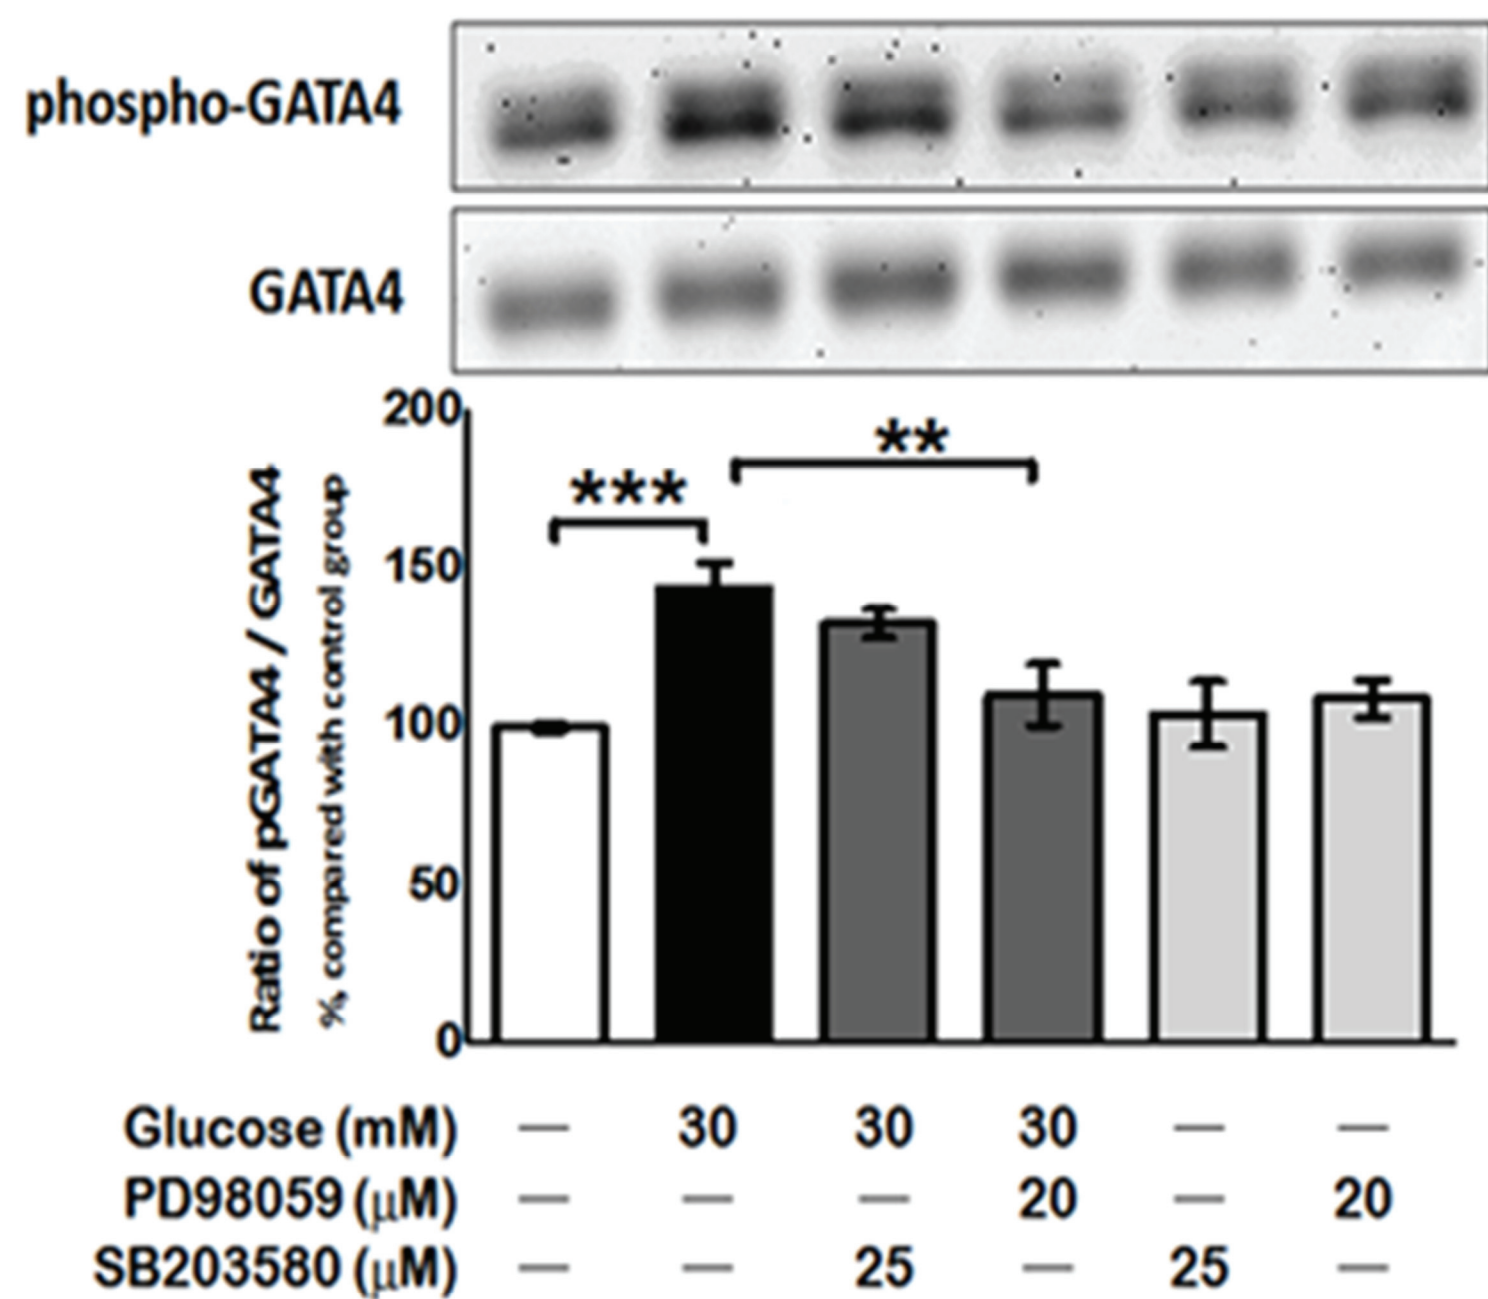**(B)**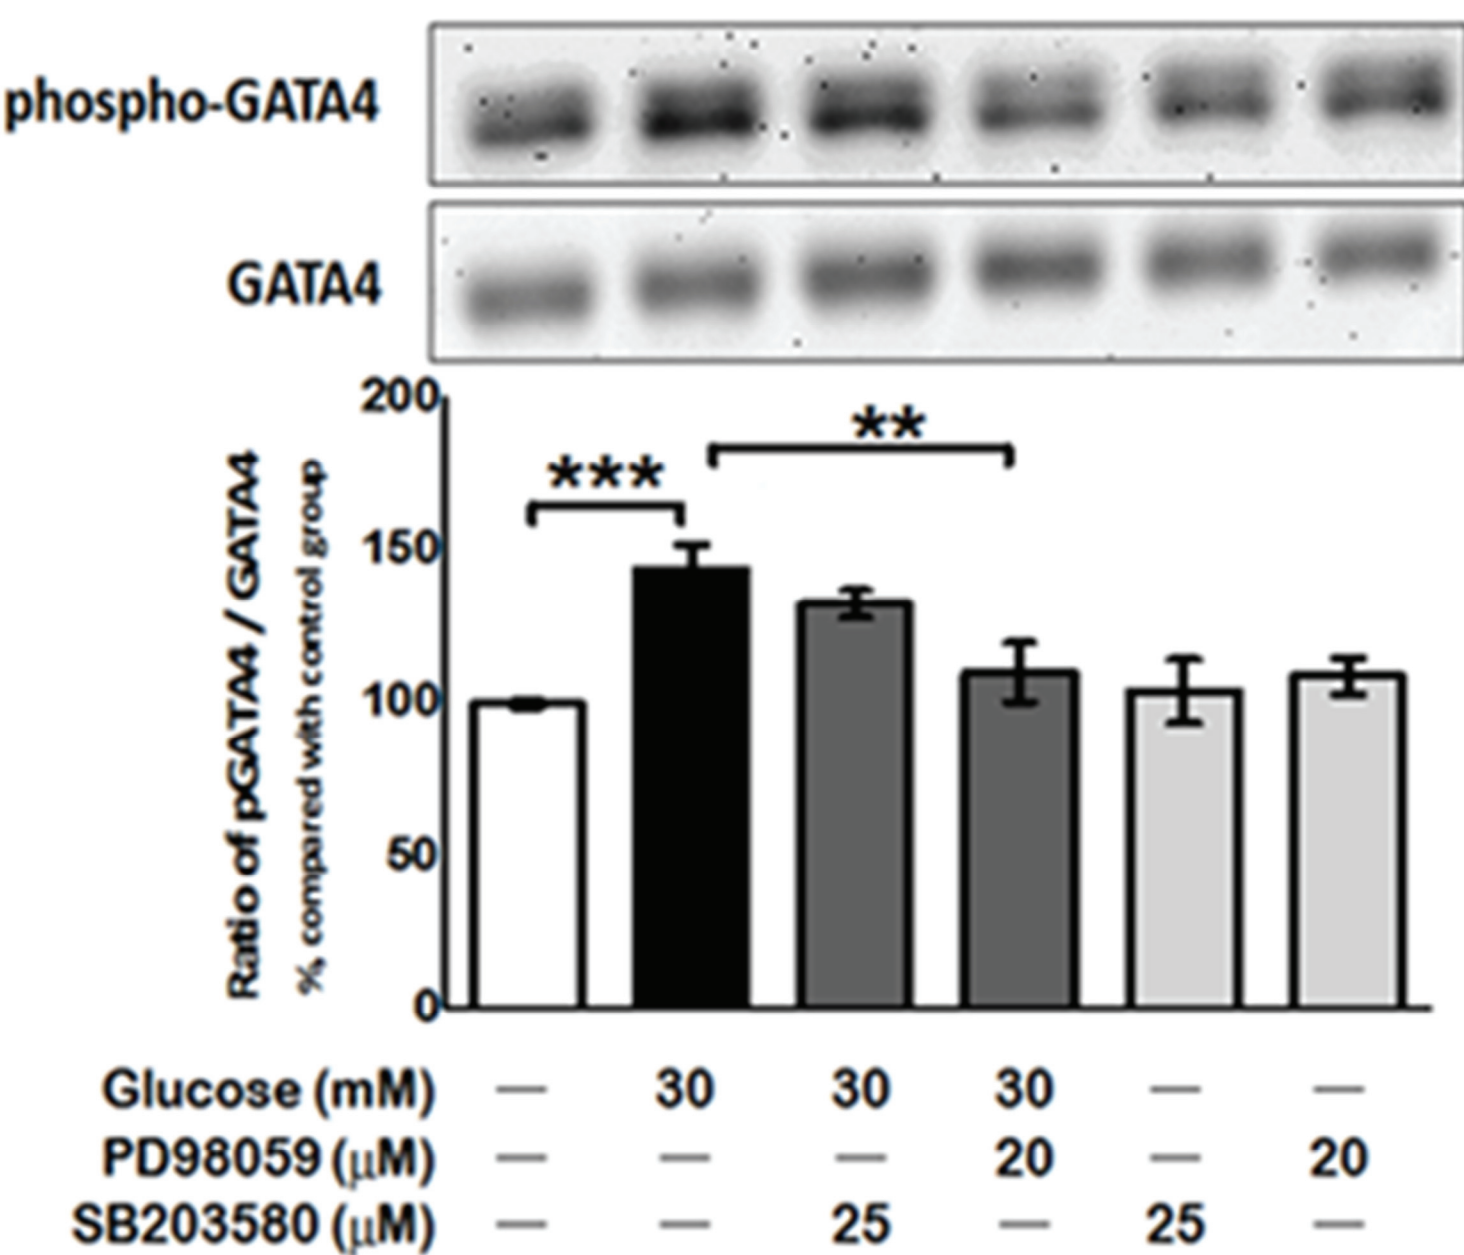**(C)**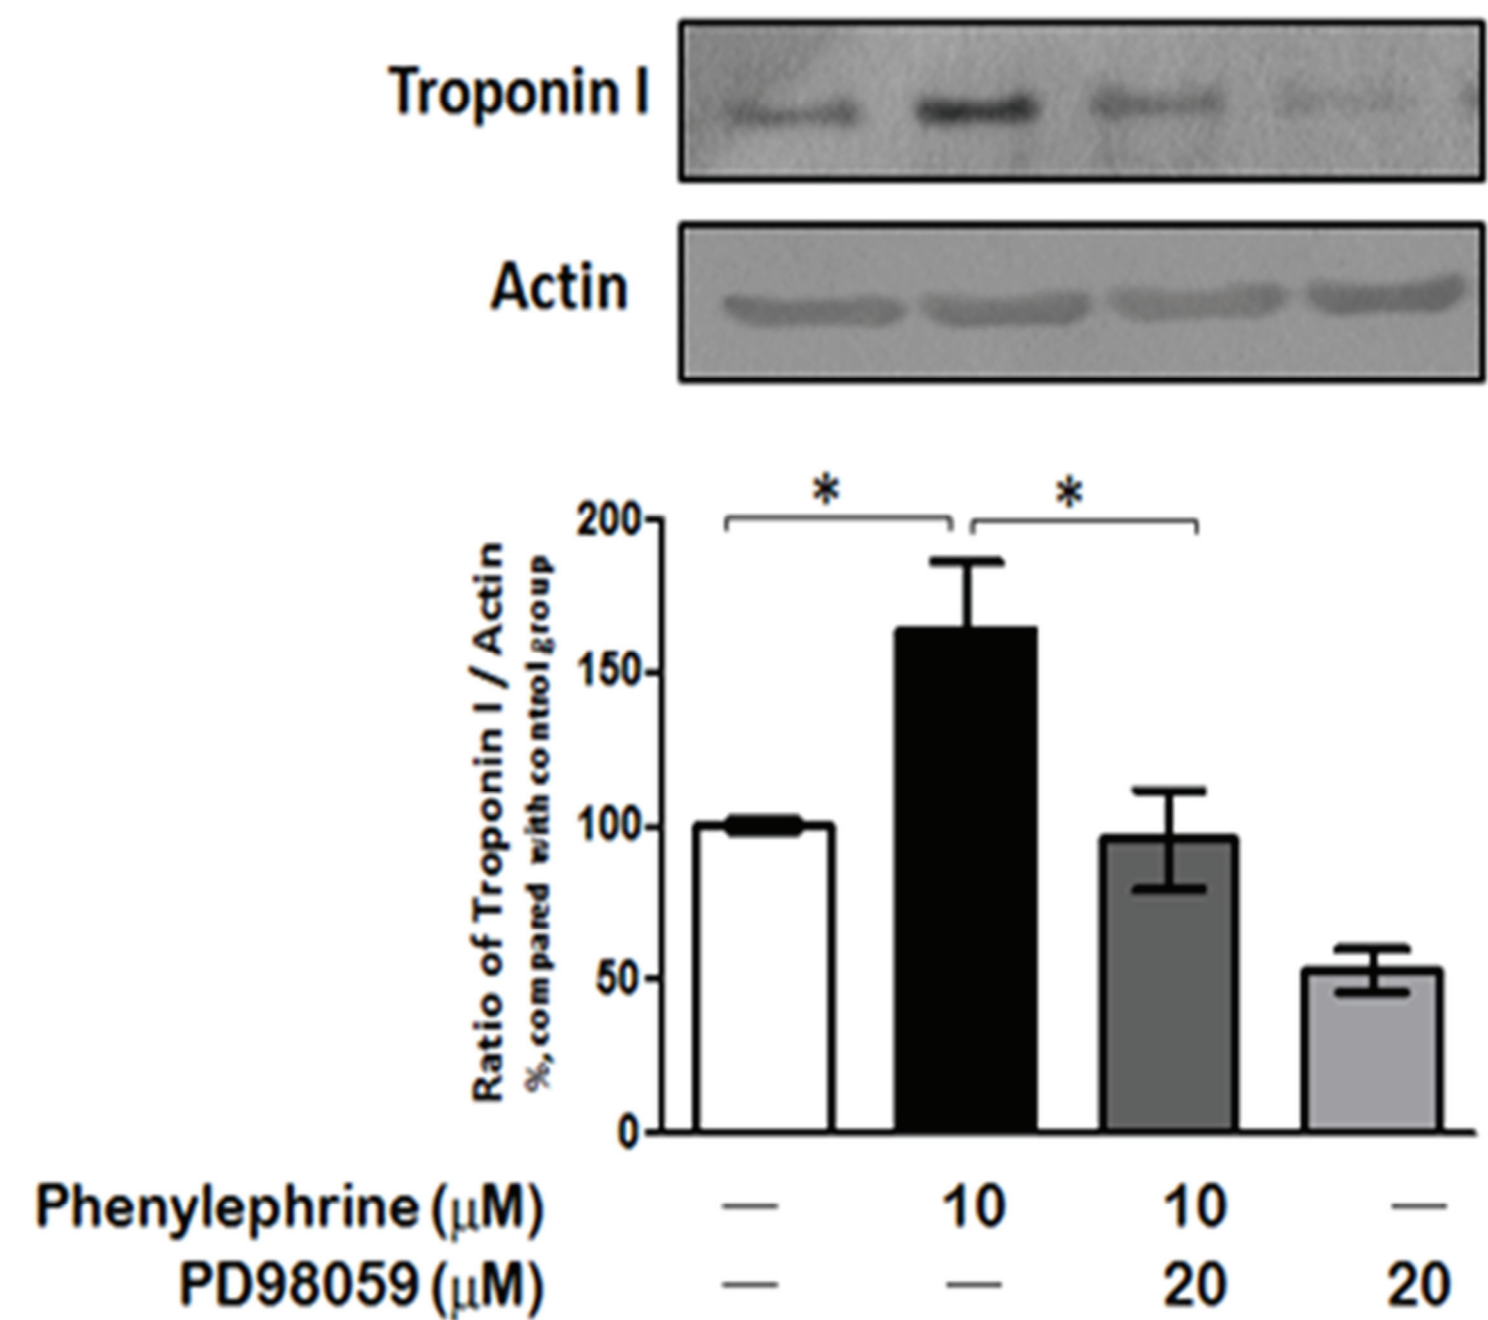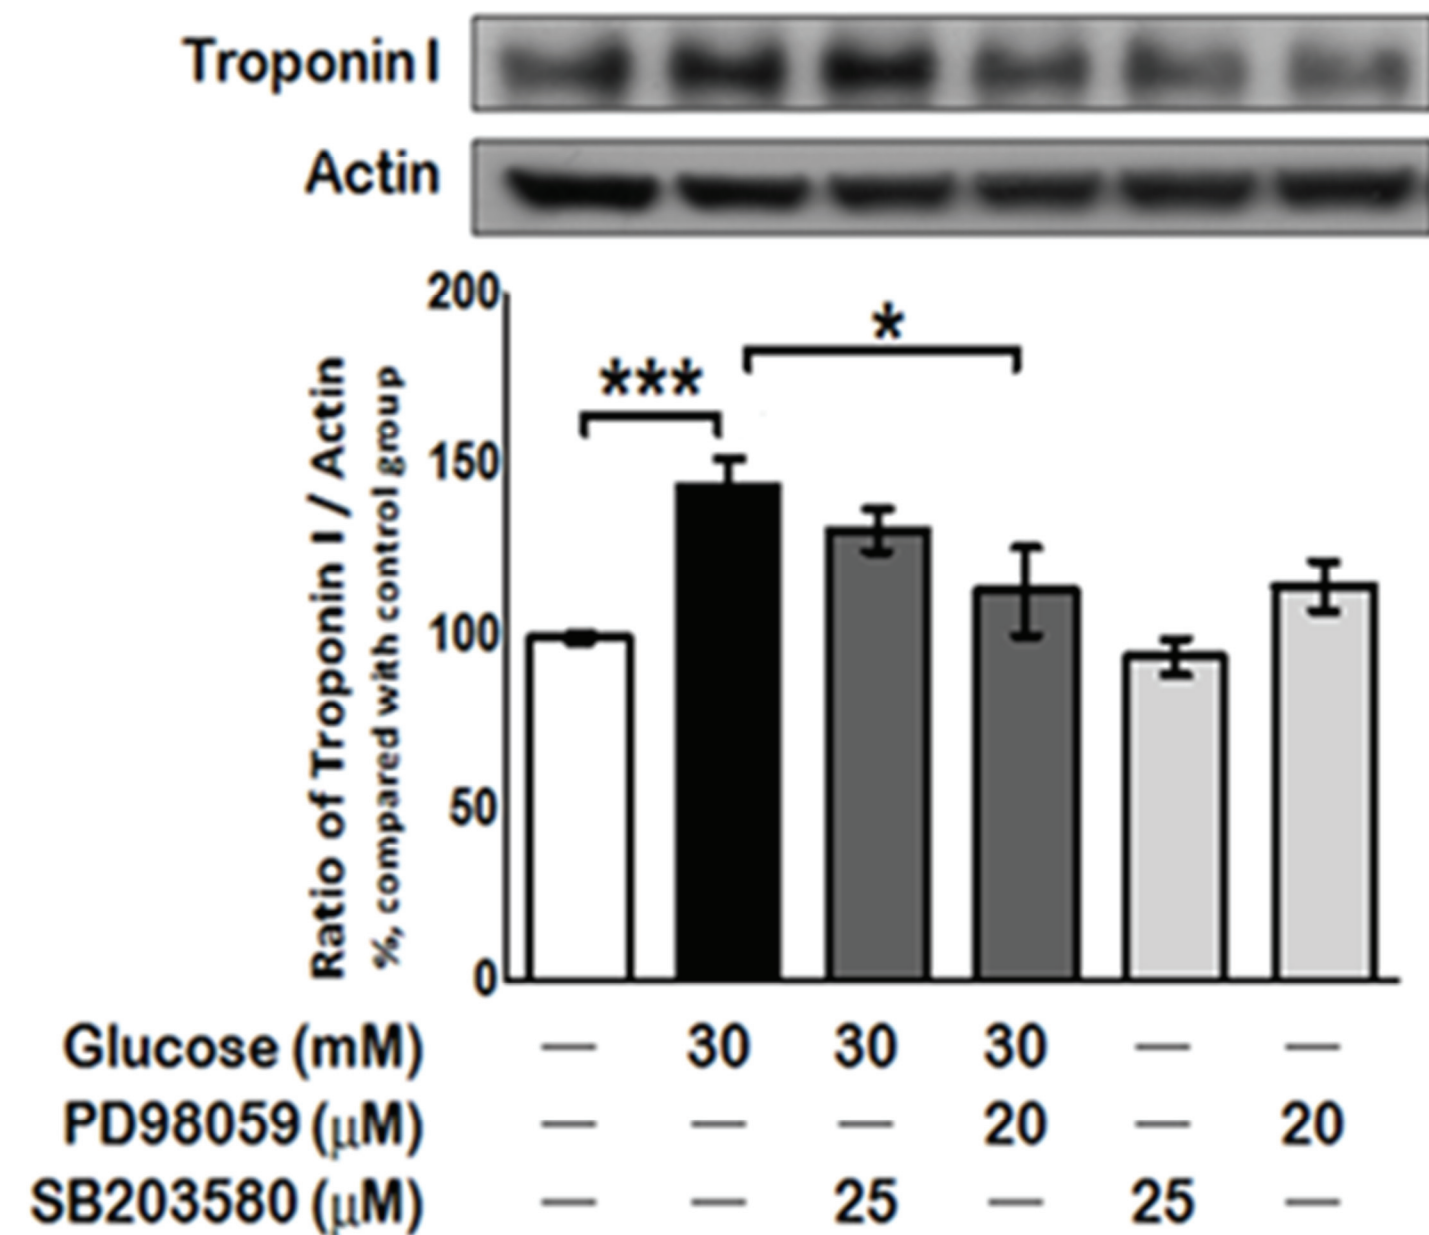

Supplement: 12933_2011_364_MOESM4_ESM.pdf [file 12933_2011_364_MOESM4_ESM.pdf]

(A)

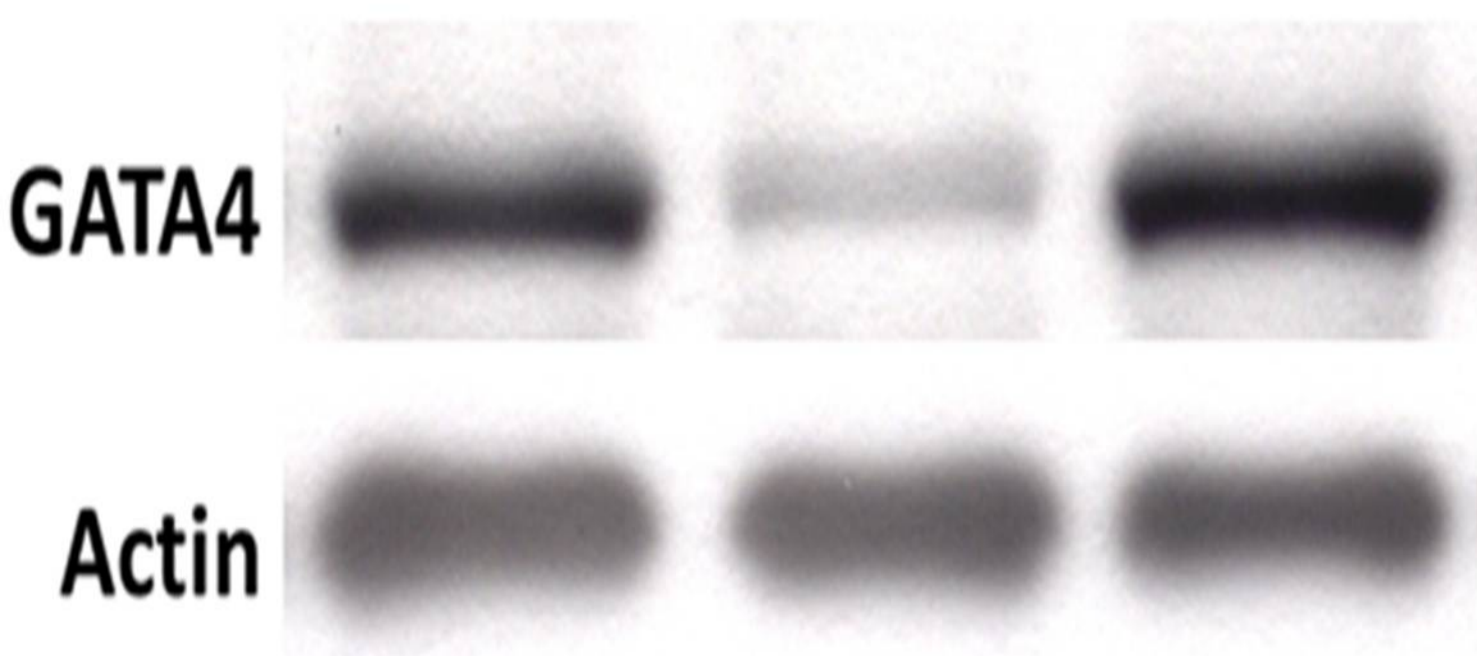

(B)

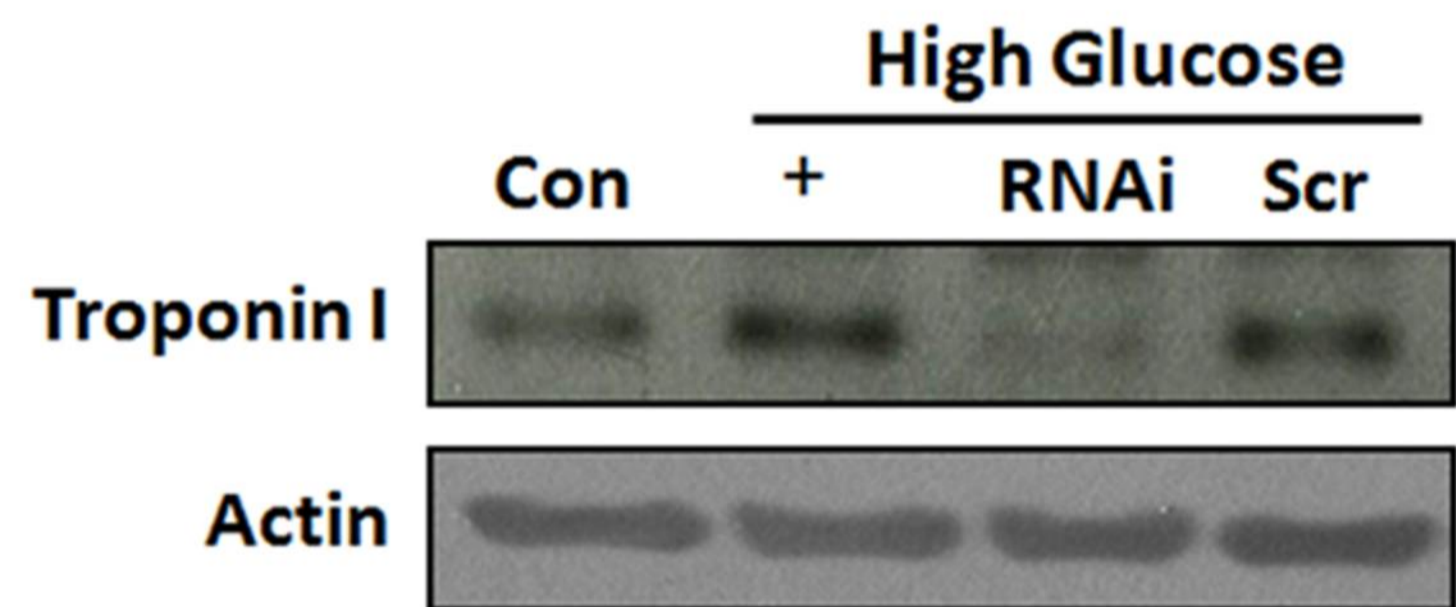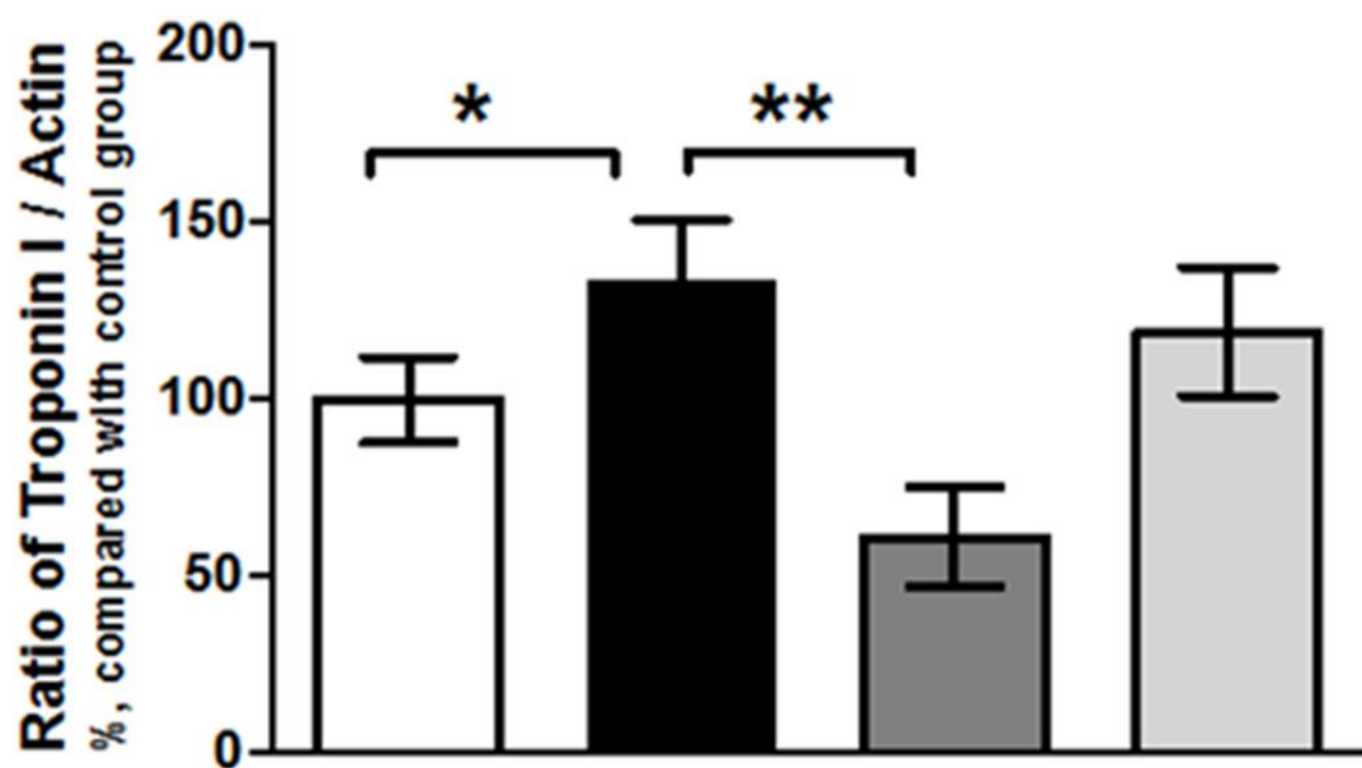

Supplement: 12933_2011_364_MOESM5_ESM.pdf [file 12933_2011_364_MOESM5_ESM.pdf]

**(A)**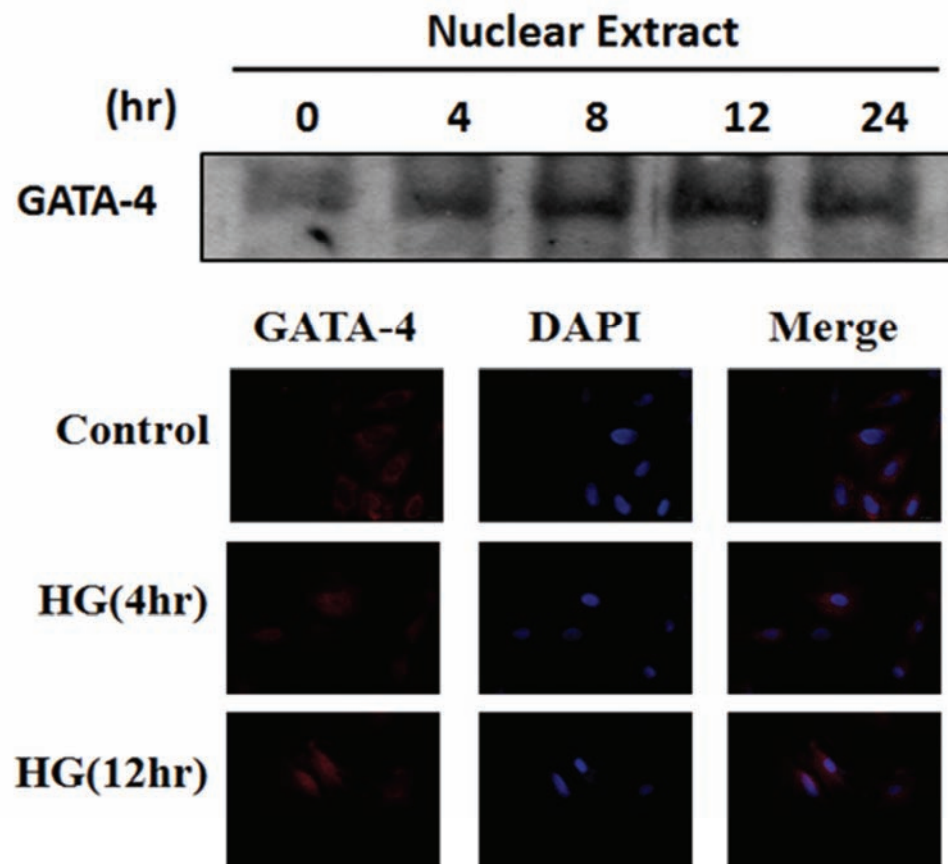**(C)**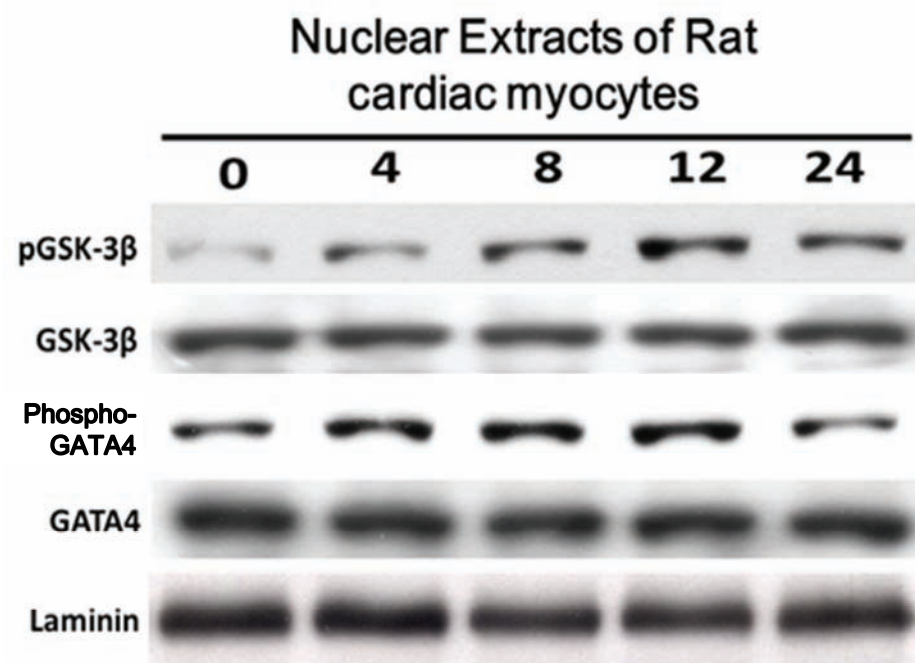**(B)**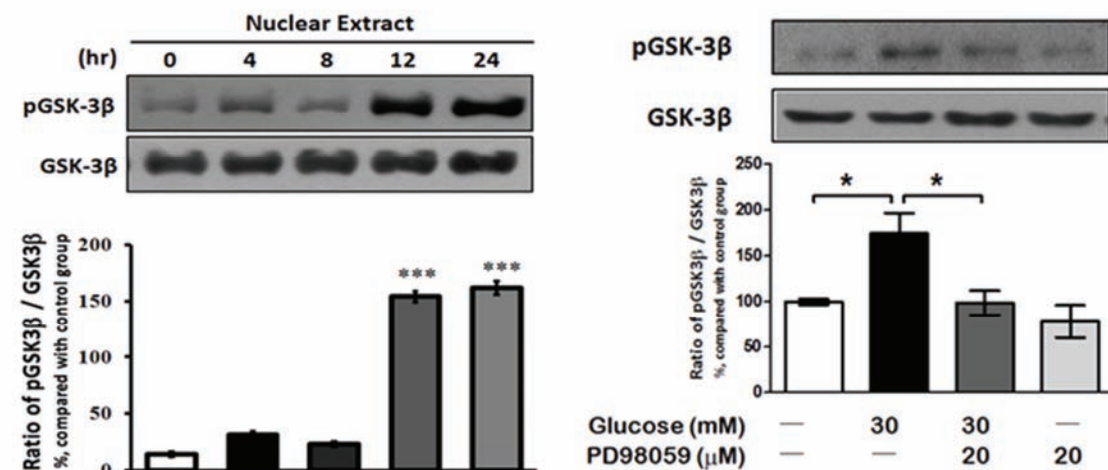**(D)**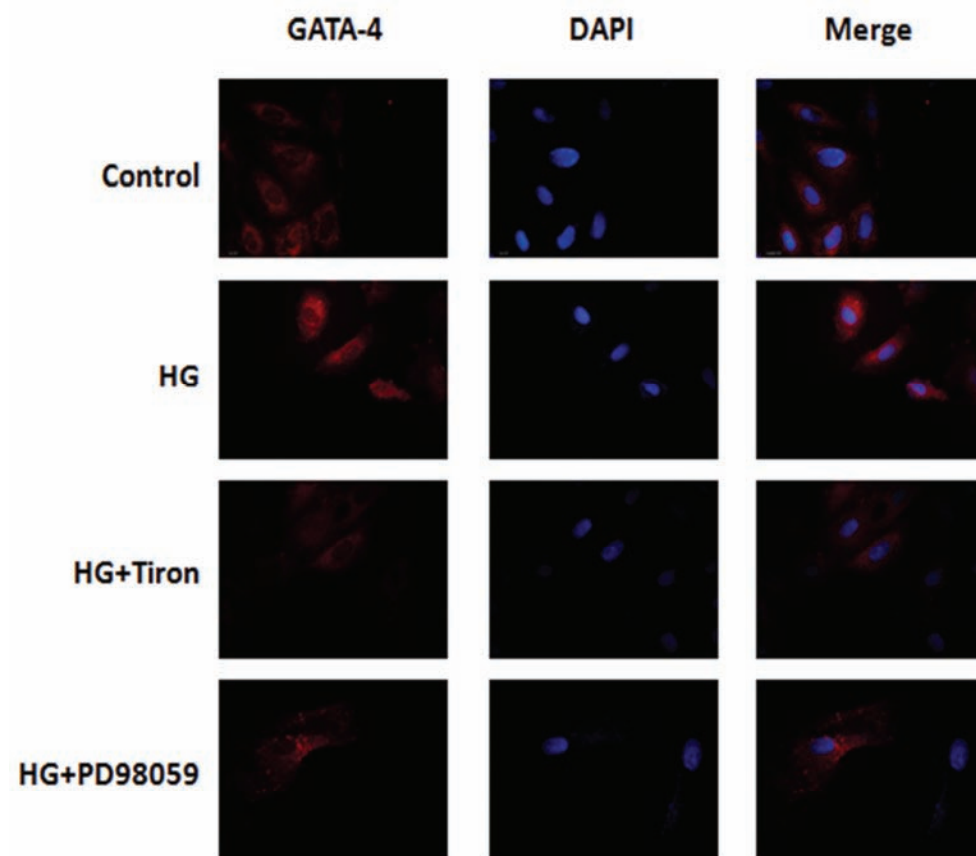

Supplement: 12933_2011_364_MOESM6_ESM.pdf [file 12933_2011_364_MOESM6_ESM.pdf]

(A)

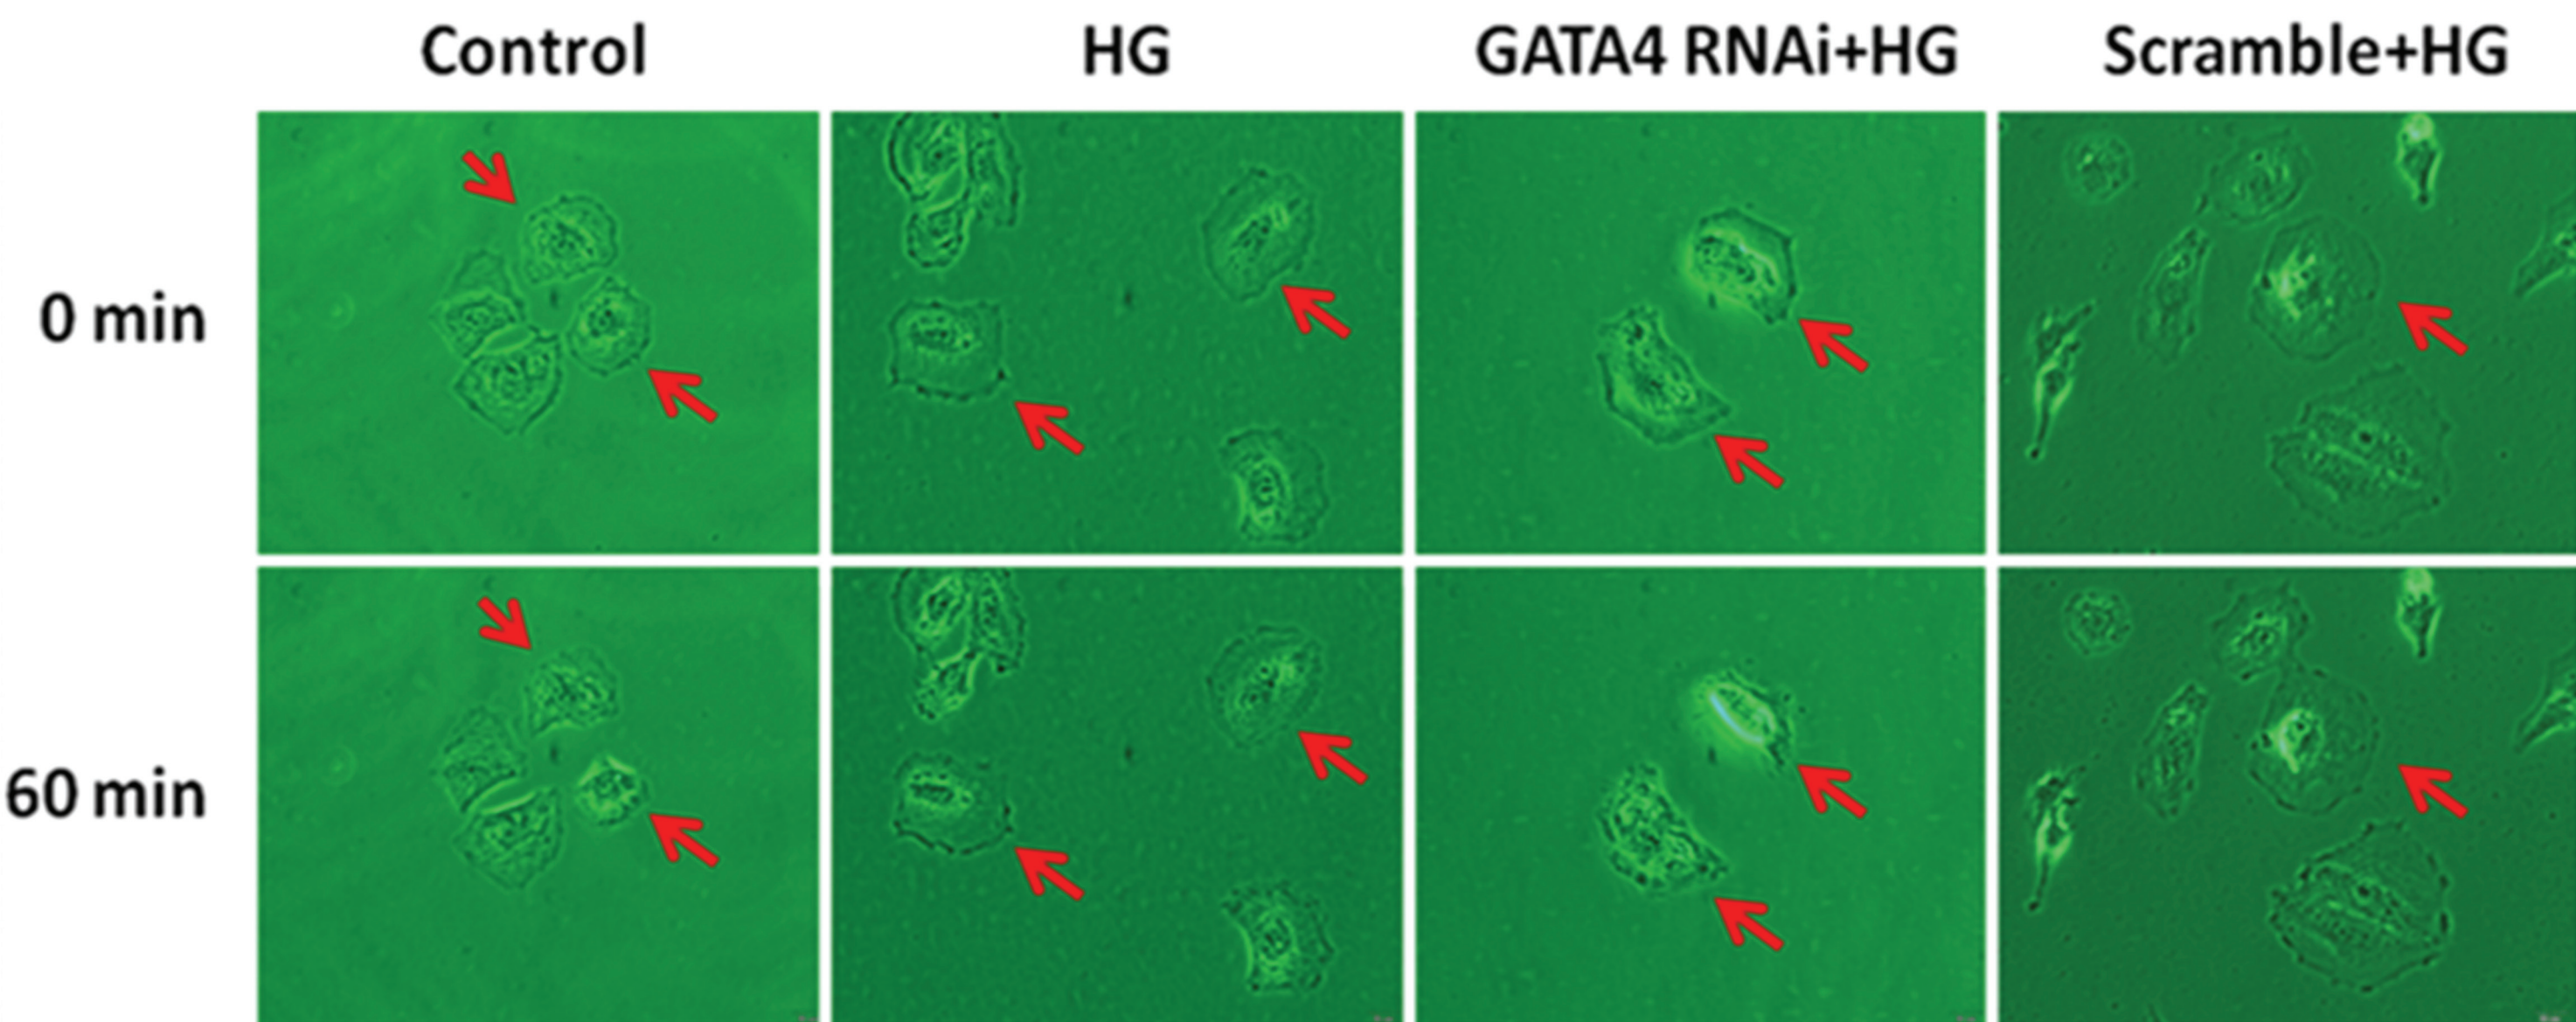

(B)

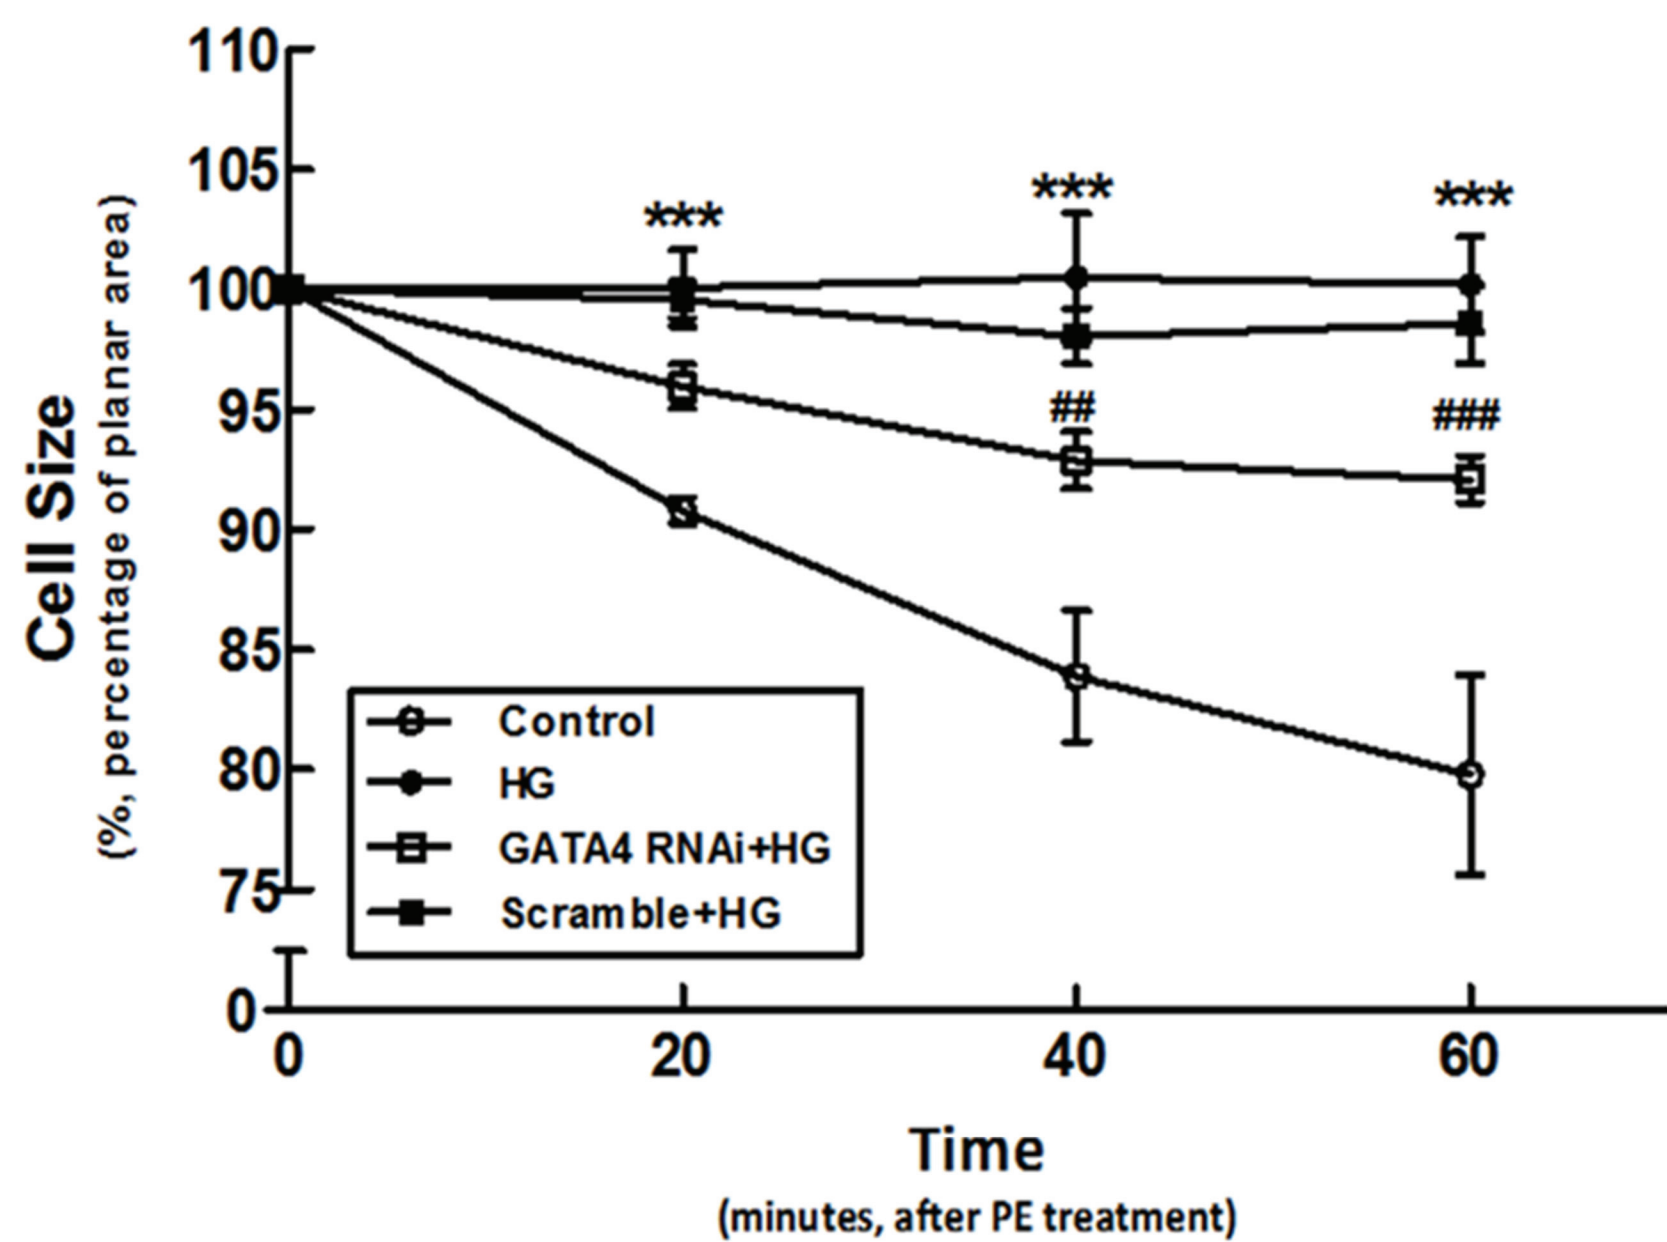

Supplement: 12933_2011_364_MOESM7_ESM.pdf [file 12933_2011_364_MOESM7_ESM.pdf]

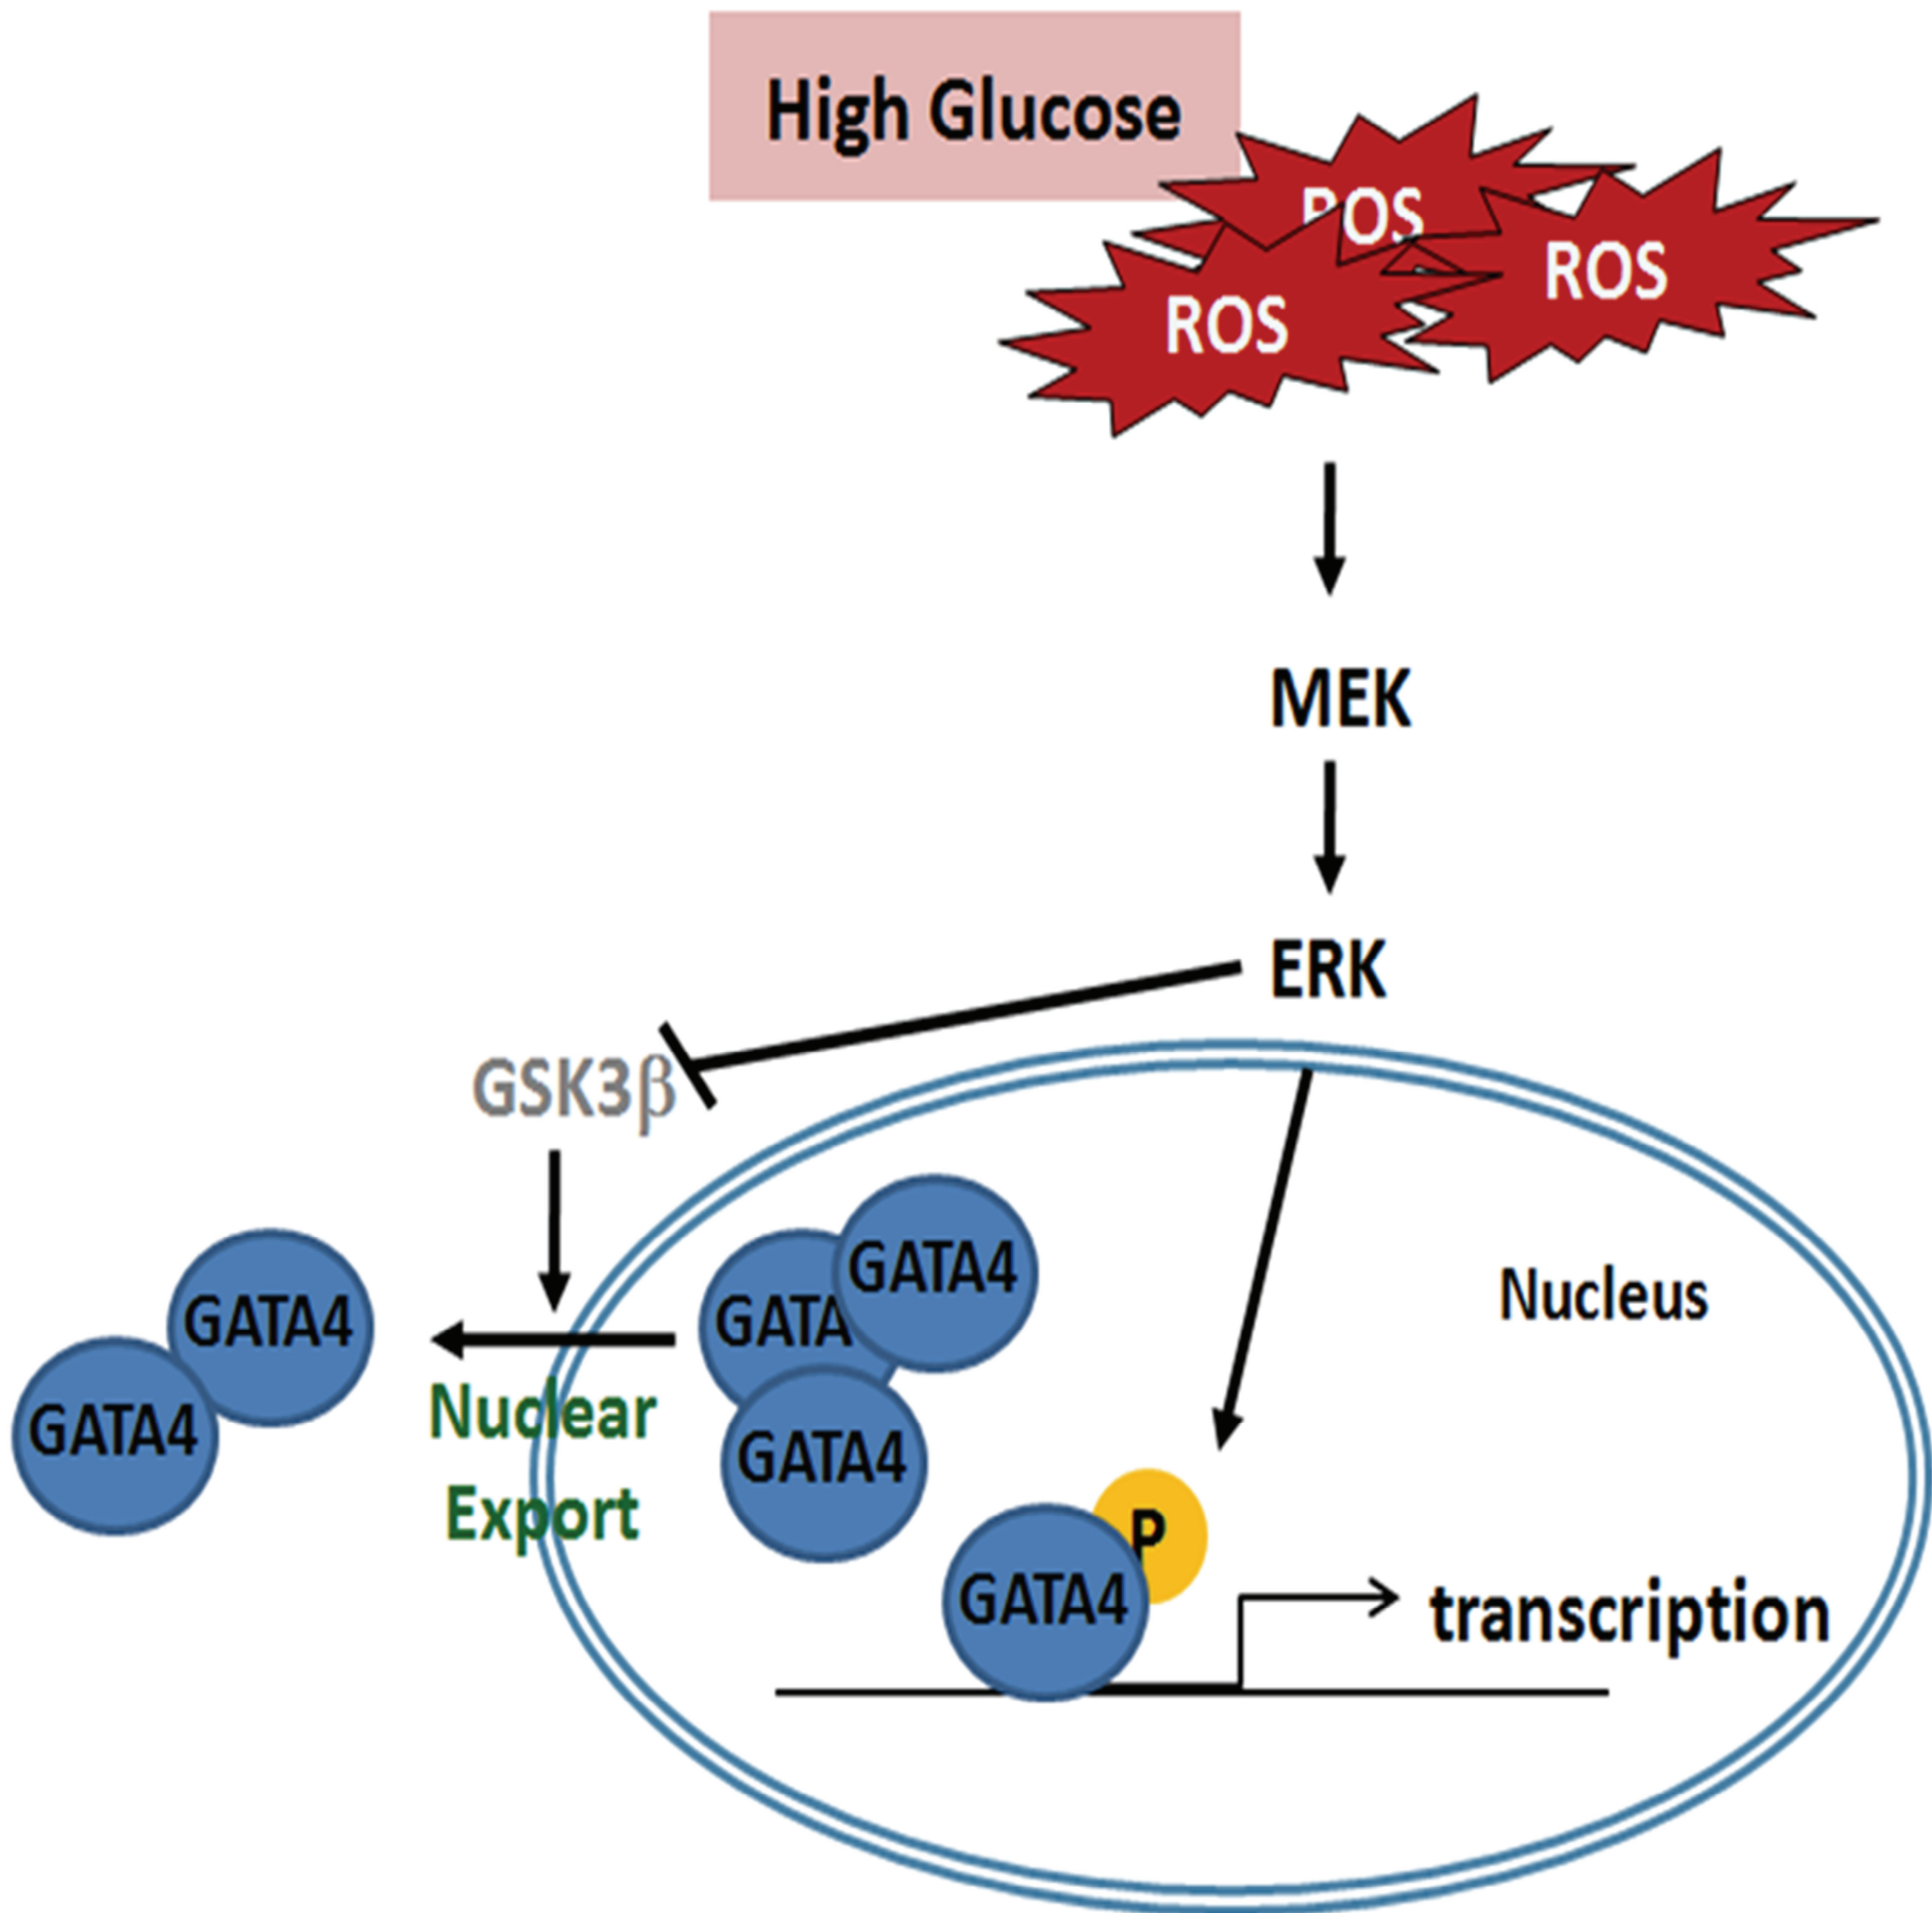

Supplement: 12933_2011_364_MOESM8_ESM.pdf [file 12933_2011_364_MOESM8_ESM.pdf]
